# Supplementary material
Source: PubMed Central journal article supplement (PMC5784442)
Supplement: NIHMS919537-supplement-Supplementary_Information.pdf [file NIHMS919537-supplement-Supplementary_Information.pdf]

**Computational redesign of acyl-ACP thioesterase with improved selectivity towards  
medium-chain fatty acids**

Matthew J. Grisewood<sup>a\*</sup>, Néstor J. Hernandez Lozada<sup>b\*</sup>, James B. Thoden<sup>c</sup>, Nathanael P. Gifford<sup>a</sup>, Daniel Mendez-Perez<sup>b</sup>, Haley A. Schoenberger<sup>b</sup>, Matthew F. Allan<sup>a</sup>, Martha E. Floy<sup>b</sup>, Rung-Yi Lai<sup>b</sup>, Hazel M. Holden<sup>c</sup>, Brian F. Pflieger<sup>b</sup> and Costas D. Maranas<sup>a,d</sup>

<sup>a</sup> Department of Chemical Engineering; Pennsylvania State University; 158 Fenske Laboratory; University Park, PA, 16802

<sup>b</sup> Department of Chemical and Biological Engineering; University of Wisconsin-Madison; 1415 Engineering Drive; Madison, WI, 53706

<sup>c</sup> Department of Biochemistry; University of Wisconsin-Madison; 440 Henry Mall; Madison, WI, 53706

<sup>d</sup> To whom correspondence should be addressed; [costas@psu.edu](mailto:costas@psu.edu); (814) 863-9958

\* Denotes co-first authorship

## Supporting Information

### *Computational and experimental $\Delta\Delta G$ calculations*

Using Michaelis-Menten kinetics, experimental  $\Delta G$  values were estimated from total FFA production levels. Correlations were found between  $\Delta\Delta G_{\text{comp}}$  and  $\Delta\Delta G_{\text{exp}}$  for C<sub>14</sub> in the R3 results and C<sub>12</sub> in the R4 results (primary constraint for each round). We used the largest cluster of mutants with similar yields (similar  $k_{\text{cat}}$  values,  $p < 0.05$ ) for each round. Apparent  $k_{\text{cat}}$  values were estimated to be proportional to the total amount of FFA produced since data was collected after the same time period (i.e., number of turnovers per 24 hours). The largest R3 cluster included eight variants (M1-M4 and M6-M9), and the largest R4 cluster included six variants (M1, M8, M13, M14, M17, and M18). These clusters represent the data points presented in **Figure S5**. Since the value of  $k_{\text{cat}}[E]_{0t}$  was approximated, we performed a sensitivity analysis by varying the initial value by  $\pm 50\%$ . The Pearson correlation coefficient for the R3 data was  $0.6 \pm 0.2$  and  $0.43 \pm 0.07$  for the R4 data. The correlation coefficients (after rounding) did not change for the sensitivity analysis, indicating that the value of  $k_{\text{cat}}[E]_{0t}$  did not strongly affect the correlation coefficients.

The correlations between  $\Delta\Delta G_{\text{comp}}$  and  $\Delta\Delta G_{\text{exp}}$  for R3 and R4 results are presented in **Figure S5**. Linear regression of the R3 and R4 data can be fitted to Equations S1 and S2, respectively.

$$\Delta\Delta G_{\text{exp}} = 0.0011 \Delta\Delta G_{\text{comp}} - 0.11 \quad (\text{S1})$$

$$\Delta\Delta G_{\text{exp}} = 0.000038 \Delta\Delta G_{\text{comp}} + 0.0043 \quad (\text{S2})$$

It is worthwhile mentioning that both Equations S1 and S2 are expected to have a slope of 1 and a y-intercept of 0. However, the slope of the regressions are not equal to 1 because calculated energies using molecular mechanics are not quantitatively meaningful so they will not match the true Gibbs free energies<sup>1</sup>. If Equations S1 and S2 are rescaled such that their slopes are equal to 1, the y-intercepts become -101.4 kJ/mol and 112.0 kJ/mol.

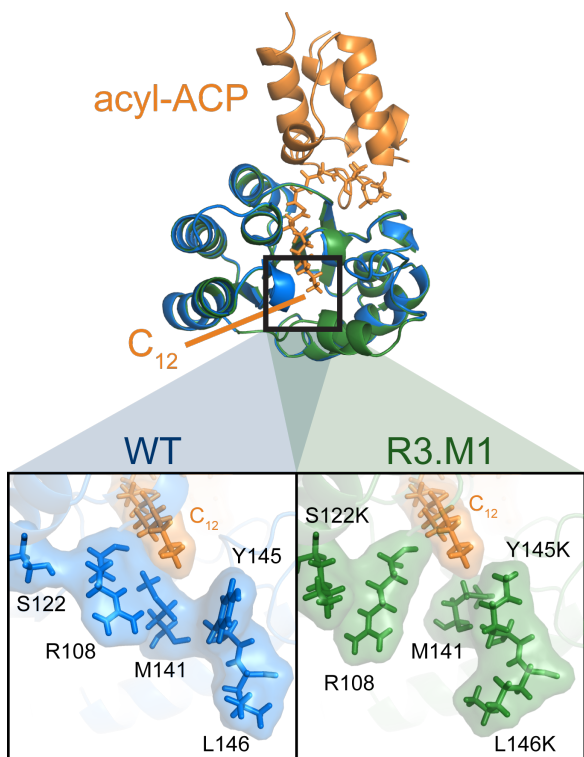

**Figure S1. IPRO-derived structure of R3.M1 bound to dodecanoyl-ACP.** The quaternary structure of the complex is shown at top with proteins shown as cartoons. Acyl-ACP is orange and the dodecanoyl moiety (C<sub>12</sub>) is depicted as sticks. The inset contrasts the binding sites of WT (blue) and R3.M1 (green). Mutated positions in R3.M1 (122, 145, and 146) are shown as sticks with a transparent surface. Two other nearby residues that show substantial movements are also formatted as sticks with transparent surfaces.

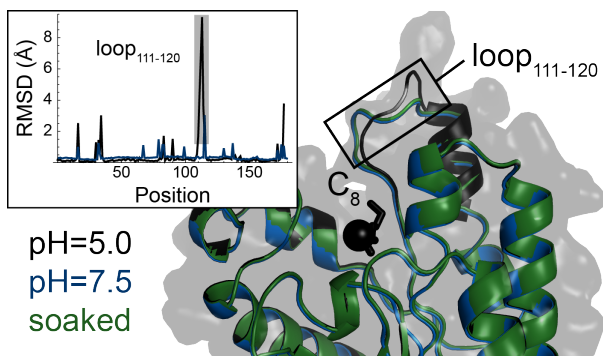

**Figure S2. Crystallized R3.M4 at three different pH conditions.** Crystallized R3.M4 under three different pH conditions is shown bound to octanoic acid ( $C_8$ ). R3.M4 is shown as a cartoon and colored black (pH 5.0), blue (pH 7.5), or green (crystallized at pH 5.0 and buffered at pH 7.5). **The carbonyl oxygen the FFA is shown as a sphere.** The loop with the largest conformational change between the three structures is labeled ( $loop_{111-120}$ ). The inset plots the RMSD of R3.M4 at pH 5.0 (black) and pH 7.5 (blue) to the soaked structure against the residue position number, quantifying the regions with the largest changes. Position 112 in the pH 5.0 structure is gray because it was not solved for the crystal and was instead modeled.

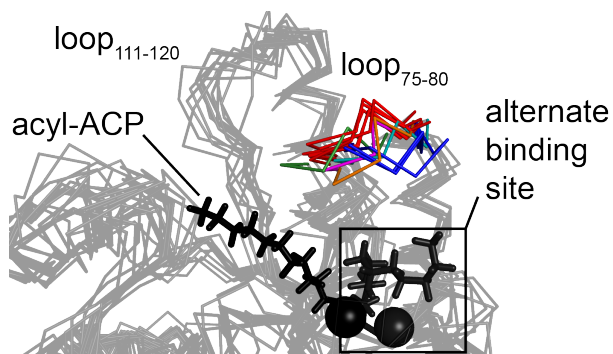

**Figure S3. Structures of bound R3.M1, R3.M4, and WT enzymes from MD simulations.** Each of the variants was shown as a black ribbon. The critical switch loop found between positions 75 and 80 was colored based on clustering of different conformations. Crystallized WT:C<sub>8</sub> published by Lo *et al.*, crystallized WT:C<sub>8</sub> from this study, crystallized R3.M4:C<sub>8</sub> (pH 5.0) from this study, WT:C<sub>12</sub> from MD, WT:C<sub>14</sub> from MD, and R3.M1:C<sub>12</sub> from MD assume a similar conformation and are colored red. Unbound ‘TesA, an unbound L109P variant (that abolishes switch loop movement), and a bound L109P variant from previous crystallography experiments assume a similar conformation and are colored blue (from Lo *et al.*). R3.M4:C<sub>8</sub> from MD, R3.M4:C<sub>12</sub> from MD, R3.M1:C<sub>14</sub>, and WT:C<sub>8</sub> are colored green, cyan, orange, and pink, respectively. **The carbonyl oxygen atoms of the acyl-ACP structures are depicted as spheres.**

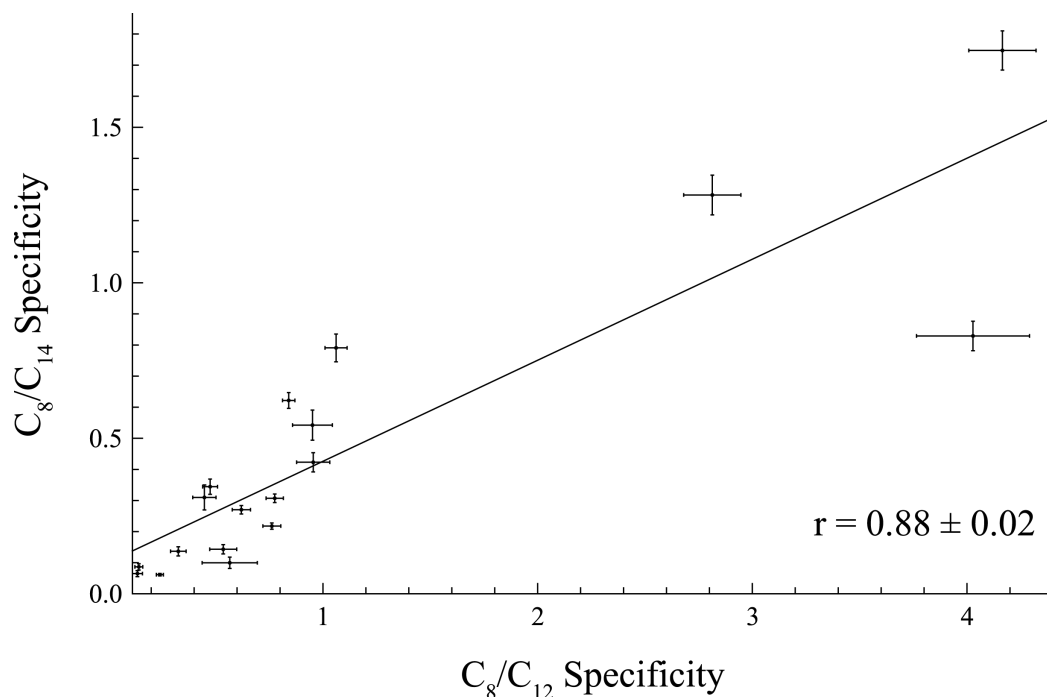

**Figure S4. Correlation between R4  $C_8/C_{12}$  and  $C_8/C_{14}$  molar composition.** The strong correlation ( $r=0.88\pm 0.02$ ) between these values supports the concept that reduced binding site volume for  $C_{12}$  binding furthermore eliminates binding to  $C_{14}$  due to its longer aliphatic chain. The slope for the linear regression is less than one, which could imply an alternative binding mode for  $C_{14}$  in addition to the conformation assumed for  $C_{12}$  binding. Error bars are standard deviations in mole fractions propagated from **Table S1**.

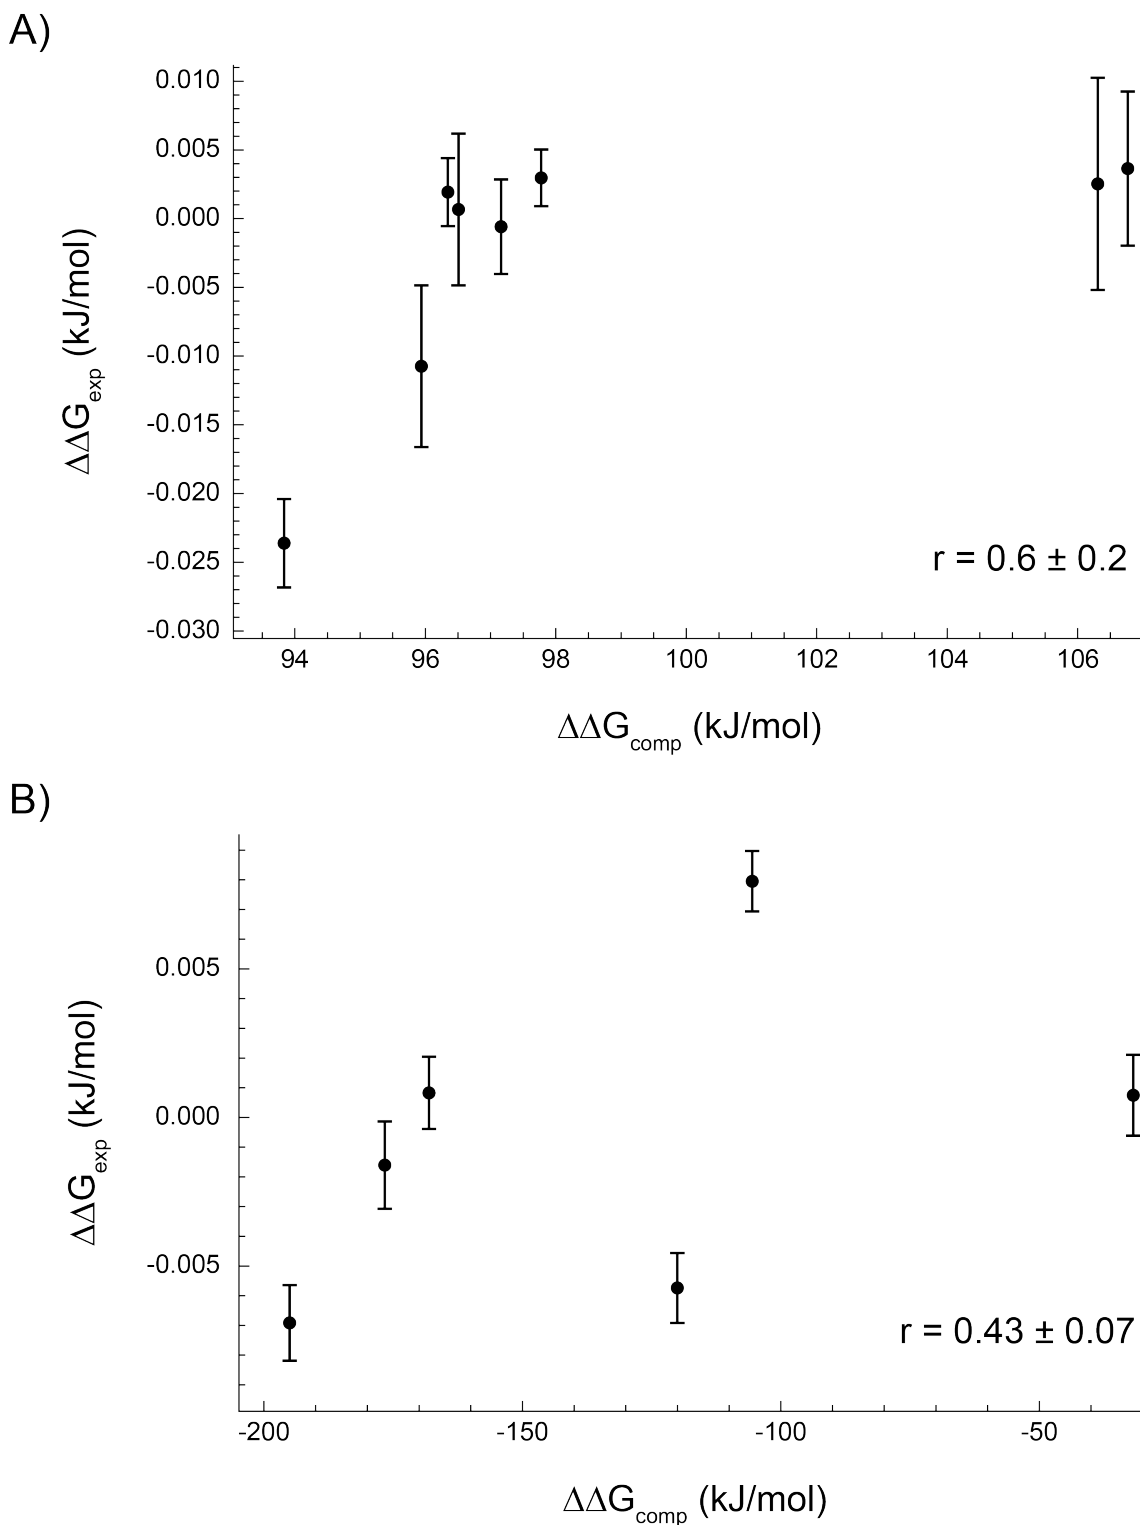

**Figure S5.** Correlation between experimentally estimated and computationally calculated  $\Delta\Delta G$  for (A) R3 and (B) R4. Experimental  $\Delta\Delta G$  values were estimated using the product compositions from Table S1 (see Supporting Information). Binding was measured between the enzyme and myristoyl-ACP for R3 and measured between the enzyme and lauroyl-ACP for R4 (i.e., the primary computational constraint). Error bars indicate experimental error, but calculated values are replicable and have no associated error.

## Tables

**Table S1. FFA production profiles for various thioesterases expressed in *E. coli*.** This table provides the mole fractions of various FFAs and total FFA in the cell lysate for enzymes considered in this study as well as those found in literature. Computationally-predicted mutants are named Rx.My, rationally-designed mutants are named Rx.RDy, and randomly-generated mutants are labeled RM.My, where x is the Round number and y is the Mutant number. Any mutant labeled in this manner derives from this study. Heterologously-expressed and overexpressed thioesterases in *E. coli* are named using their GenBank accession label and engineered mutants from literature (beginning with “CvB2MT”, “rTE”, “TEGm” or “UcFatB”) are named as they are in the original source. “nd” indicates that the value was not determined or provided.

| Name    | Organism       | 8:0           | 10:0            | 12:0           | 12:1          | 14:0           | 14:1            | 16:0           | 16:1           | 18:0            | 18:1            | Total FFA ( $\mu\text{M}$ ) | Notes | Source |
|---------|----------------|---------------|-----------------|----------------|---------------|----------------|-----------------|----------------|----------------|-----------------|-----------------|-----------------------------|-------|--------|
| Control | <i>E. coli</i> | 2.4 $\pm$ 0.3 | 0.6 $\pm$ 0.2   | 3.6 $\pm$ 0.8  | 0.6 $\pm$ 0.9 | 17 $\pm$ 2     | 0.51 $\pm$ 0.06 | 57 $\pm$ 6     | 12 $\pm$ 2     | 1.3 $\pm$ 0.1   | 4.5 $\pm$ 0.6   | 300 $\pm$ 20                | -     | -      |
| WT      | <i>E. coli</i> | 5.9 $\pm$ 0.3 | 1.09 $\pm$ 0.06 | 20 $\pm$ 1     | 7.5 $\pm$ 0.5 | 29 $\pm$ 2     | 7.1 $\pm$ 0.4   | 14.2 $\pm$ 0.8 | 11.6 $\pm$ 0.8 | 0.22 $\pm$ 0.01 | 2.1 $\pm$ 0.1   | 1900 $\pm$ 50               | -     | -      |
| R1.M1   | <i>E. coli</i> | 19 $\pm$ 2    | 6.0 $\pm$ 0.5   | 12.1 $\pm$ 0.7 | 31 $\pm$ 2    | 4.4 $\pm$ 0.3  | 14.9 $\pm$ 0.7  | 4.7 $\pm$ 0.7  | 6.4 $\pm$ 0.8  | 1.52 $\pm$ 0.10 | 0.11 $\pm$ 0.01 | 4300 $\pm$ 100              | -     | -      |
| R1.M2   | <i>E. coli</i> | 13 $\pm$ 2    | 2.2 $\pm$ 0.5   | 5.8 $\pm$ 0.5  | 2.0 $\pm$ 0.1 | 28 $\pm$ 2     | 3.7 $\pm$ 0.3   | 27 $\pm$ 2     | 8.5 $\pm$ 0.6  | 0.9 $\pm$ 0.2   | 4.1 $\pm$ 0.5   | 650 $\pm$ 30                | -     | -      |
| R1.M3   | <i>E. coli</i> | 5 $\pm$ 4     | 1 $\pm$ 2       | 3 $\pm$ 2      | 3 $\pm$ 2     | 11 $\pm$ 2     | 0.0 $\pm$ 0.0   | 60 $\pm$ 10    | 2.5 $\pm$ 0.5  | 1.9 $\pm$ 0.4   | 4 $\pm$ 1       | 190 $\pm$ 40                | -     | -      |
| R1.M4   | <i>E. coli</i> | 0.0 $\pm$ 0.0 | 0.0 $\pm$ 0.0   | 10 $\pm$ 10    | 3 $\pm$ 6     | 12 $\pm$ 2     | 3 $\pm$ 1       | 64 $\pm$ 8     | 3.2 $\pm$ 0.7  | 2.5 $\pm$ 0.5   | 3.5 $\pm$ 0.7   | 230 $\pm$ 30                | -     | -      |
| R1.M5   | <i>E. coli</i> | 0.0 $\pm$ 0.0 | 0.0 $\pm$ 0.0   | 3 $\pm$ 5      | 2 $\pm$ 3     | 13 $\pm$ 3     | 2 $\pm$ 3       | 70 $\pm$ 6     | 4 $\pm$ 1      | 2.3 $\pm$ 0.3   | 4.3 $\pm$ 0.6   | 160 $\pm$ 20                | -     | -      |
| R1.M6   | <i>E. coli</i> | 0.0 $\pm$ 0.0 | 0.0 $\pm$ 0.0   | 10 $\pm$ 10    | 4 $\pm$ 6     | 14 $\pm$ 5     | 2 $\pm$ 4       | 60 $\pm$ 10    | 4 $\pm$ 2      | 2.3 $\pm$ 0.5   | 4 $\pm$ 1       | 180 $\pm$ 30                | -     | -      |
| R1.M7   | <i>E. coli</i> | 0.0 $\pm$ 0.0 | 0.0 $\pm$ 0.0   | 2 $\pm$ 3      | 0.0 $\pm$ 0.0 | 13 $\pm$ 2     | 3 $\pm$ 3       | 72 $\pm$ 5     | 3.5 $\pm$ 0.8  | 2.4 $\pm$ 0.5   | 4.2 $\pm$ 0.8   | 170 $\pm$ 20                | -     | -      |
| R1.M8   | <i>E. coli</i> | 0.0 $\pm$ 0.0 | 0.0 $\pm$ 0.0   | 1 $\pm$ 2      | 0.0 $\pm$ 0.0 | 13 $\pm$ 4     | 1 $\pm$ 2       | 74 $\pm$ 5     | 3.3 $\pm$ 0.8  | 2.5 $\pm$ 0.7   | 4 $\pm$ 1       | 170 $\pm$ 30                | -     | -      |
| R1.M9   | <i>E. coli</i> | 0.0 $\pm$ 0.0 | 0.0 $\pm$ 0.0   | 5 $\pm$ 4      | 2 $\pm$ 3     | 14 $\pm$ 2     | 2 $\pm$ 3       | 69 $\pm$ 4     | 3.0 $\pm$ 0.4  | 2.6 $\pm$ 0.5   | 4.1 $\pm$ 0.3   | 180 $\pm$ 10                | -     | -      |
| R1.M10  | <i>E. coli</i> | 0.0 $\pm$ 0.0 | 0.0 $\pm$ 0.0   | 4 $\pm$ 3      | 0.0 $\pm$ 0.0 | 13 $\pm$ 1     | 1 $\pm$ 2       | 72 $\pm$ 3     | 3.3 $\pm$ 0.2  | 2.4 $\pm$ 0.2   | 4.8 $\pm$ 0.9   | 164 $\pm$ 8                 | -     | -      |
| R1.M11  | <i>E. coli</i> | 0.0 $\pm$ 0.0 | 0.0 $\pm$ 0.0   | 3 $\pm$ 3      | 0.0 $\pm$ 0.0 | 14 $\pm$ 3     | 0.0 $\pm$ 0.0   | 73 $\pm$ 4     | 4 $\pm$ 1      | 2.6 $\pm$ 0.5   | 3.4 $\pm$ 0.7   | 180 $\pm$ 20                | -     | -      |
| R1.M12  | <i>E. coli</i> | 0.0 $\pm$ 0.0 | 0.0 $\pm$ 0.0   | 4 $\pm$ 3      | 2 $\pm$ 3     | 13 $\pm$ 2     | 3 $\pm$ 3       | 69 $\pm$ 4     | 2.9 $\pm$ 0.3  | 2.5 $\pm$ 0.3   | 4.0 $\pm$ 0.6   | 160 $\pm$ 10                | -     | -      |
| R2.M1   | <i>E. coli</i> | 7 $\pm$ 1     | 0.0 $\pm$ 0.0   | 1.2 $\pm$ 0.1  | 0.0 $\pm$ 0.0 | 12 $\pm$ 1     | 0.7 $\pm$ 0.1   | 47 $\pm$ 2     | 13.6 $\pm$ 0.7 | 0.7 $\pm$ 0.0   | 4.2 $\pm$ 0.3   | 510 $\pm$ 20                | -     | -      |
| R2.M2   | <i>E. coli</i> | 7.3 $\pm$ 0.4 | 0.7 $\pm$ 0.0   | 1.4 $\pm$ 0.1  | 0.0 $\pm$ 0.0 | 14.7 $\pm$ 0.7 | 0.9 $\pm$ 0.0   | 53.8 $\pm$ 0.9 | 15.7 $\pm$ 0.8 | 0.8 $\pm$ 0.0   | 4.7 $\pm$ 0.2   | 447 $\pm$ 8                 | -     | -      |
| R2.M3   | <i>E. coli</i> | 8 $\pm$ 1     | 0.0 $\pm$ 0.0   | 1.4 $\pm$ 0.1  | 0.0 $\pm$ 0.0 | 11.8 $\pm$ 0.4 | 0.7 $\pm$ 0.0   | 47 $\pm$ 1     | 14.6 $\pm$ 0.7 | 0.8 $\pm$ 0.0   | 4.1 $\pm$ 0.3   | 480 $\pm$ 10                | -     | -      |
| R2.M4   | <i>E. coli</i> | 6.3 $\pm$ 0.7 | 0.6 $\pm$ 0.0   | 1.3 $\pm$ 0.1  | 0.0 $\pm$ 0.0 | 12.4 $\pm$ 0.8 | 0.7 $\pm$ 0.1   | 47 $\pm$ 2     | 14 $\pm$ 1     | 0.4 $\pm$ 0.0   | 3.7 $\pm$ 0.4   | 520 $\pm$ 20                | -     | -      |
| R2.M5   | <i>E. coli</i> | 5.9 $\pm$ 0.4 | 2.4 $\pm$ 0.2   | 12.9 $\pm$ 0.8 | 6.1 $\pm$ 0.4 | 38 $\pm$ 2     | 6.4 $\pm$ 0.5   | 8.4 $\pm$ 0.6  | 17 $\pm$ 2     | 0.1 $\pm$ 0.0   | 1.8 $\pm$ 0.2   | 3500 $\pm$ 100              | -     | -      |
| R2.M6   | <i>E. coli</i> | 1.2 $\pm$ 0.2 | 0.0 $\pm$ 0.0   | 1.3 $\pm$ 0.1  | 0.0 $\pm$ 0.0 | 11.6 $\pm$ 0.6 | 0.7 $\pm$ 0.0   | 49 $\pm$ 2     | 15.3 $\pm$ 0.9 | 0.7 $\pm$ 0.1   | 4.0 $\pm$ 0.3   | 500 $\pm$ 10                | -     | -      |
| R2.M7   | <i>E. coli</i> | 1.3 $\pm$ 0.1 | 0.0 $\pm$ 0.0   | 1.4 $\pm$ 0.0  | 0.0 $\pm$ 0.0 | 12.4 $\pm$ 0.5 | 0.7 $\pm$ 0.0   | 48 $\pm$ 1     | 16.2 $\pm$ 0.4 | 0.8 $\pm$ 0.0   | 4.1 $\pm$ 0.2   | 510 $\pm$ 10                | -     | -      |
| R2.M8   | <i>E. coli</i> | 1.5 $\pm$ 0.1 | 0.0 $\pm$ 0.0   | 1.6 $\pm$ 0.1  | 0.0 $\pm$ 0.0 | 15 $\pm$ 1     | 0.9 $\pm$ 0.1   | 57 $\pm$ 2     | 19 $\pm$ 1     | 0.8 $\pm$ 0.0   | 4.9 $\pm$ 0.5   | 440 $\pm$ 20                | -     | -      |
| R2.M9   | <i>E. coli</i> | 1.0 $\pm$ 0.1 | 0.0 $\pm$ 0.0   | 1.2 $\pm$ 0.1  | 0.0 $\pm$ 0.0 | 11.0 $\pm$ 0.7 | 0.6 $\pm$ 0.0   | 48 $\pm$ 1     | 15.4 $\pm$ 0.5 | 0.8 $\pm$ 0.0   | 4.1 $\pm$ 0.3   | 420 $\pm$ 10                | -     | -      |
| R2.M10  | <i>E. coli</i> | 1.2 $\pm$ 0.2 | 0.8 $\pm$ 0.1   | 1.5 $\pm$ 0.2  | 0.0 $\pm$ 0.0 | 14 $\pm$ 2     | 0.8 $\pm$ 0.1   | 56 $\pm$ 3     | 20 $\pm$ 3     | 0.9 $\pm$ 0.1   | 4.7 $\pm$ 0.4   | 380 $\pm$ 30                | -     | -      |
| R2.M11  | <i>E. coli</i> | 1.4 $\pm$ 0.1 | 0.0 $\pm$ 0.0   | 1.6 $\pm$ 0.1  | 0.0 $\pm$ 0.0 | 14.3 $\pm$ 0.9 | 0.8 $\pm$ 0.0   | 57 $\pm$ 1     | 18.5 $\pm$ 0.8 | 1.0 $\pm$ 0.0   | 5.1 $\pm$ 0.2   | 355 $\pm$ 10                | -     | -      |
| R2.M12  | <i>E. coli</i> | 1.3 $\pm$ 0.2 | 0.0 $\pm$ 0.0   | 1.6 $\pm$ 0.1  | 0.0 $\pm$ 0.0 | 13.1 $\pm$ 0.8 | 0.8 $\pm$ 0.0   | 57.1 $\pm$ 0.9 | 18.9 $\pm$ 0.5 | 2.0 $\pm$ 0.1   | 5.2 $\pm$ 0.2   | 343 $\pm$ 7                 | -     | -      |



|        |                |          |         |          |         |          |         |          |          |         |         |          |   |   |
|--------|----------------|----------|---------|----------|---------|----------|---------|----------|----------|---------|---------|----------|---|---|
| R2.M13 | <i>E. coli</i> | 1.1±0.3  | 0.0±0.0 | 1.4±0.3  | 0.0±0.0 | 9±3      | 0.6±0.2 | 62±8     | 11±5     | 0.7±0.7 | 4±2     | 480±90   | - | - |
| R2.M14 | <i>E. coli</i> | 1.8±0.2  | 0.9±0.1 | 2.6±0.3  | 0.0±0.0 | 15±1     | 1.1±0.1 | 44±2     | 15±1     | 0.9±0.1 | 4.1±0.4 | 460±20   | - | - |
| R2.RD1 | <i>E. coli</i> | 2.9±0.2  | 2.8±0.2 | 20.5±0.9 | 1.7±0.1 | 31.2±0.7 | 7.8±0.3 | 17.1±0.7 | 13.2±0.5 | 0.1±0.0 | 2.0±0.1 | 2100±30  | - | - |
| R2.RD2 | <i>E. coli</i> | 1.2±0.0  | 0.8±0.0 | 1.5±0.1  | 0.0±0.0 | 12.2±0.3 | 0.7±0.0 | 46.4±0.9 | 15.4±0.6 | 0.8±0.0 | 4.5±0.1 | 380±8    | - | - |
| R2.RD3 | <i>E. coli</i> | 1.4±0.1  | 0.9±0.0 | 1.9±0.1  | 0.0±0.0 | 16±1     | 0.8±0.0 | 55.7±0.9 | 17.8±0.6 | 1.0±0.0 | 4.7±0.4 | 336±6    | - | - |
| R2.RD4 | <i>E. coli</i> | 1.2±0.1  | 0.7±0.0 | 1.4±0.1  | 0.0±0.0 | 12.7±0.8 | 0.6±0.0 | 46±2     | 15±1     | 0.8±0.1 | 4.1±0.3 | 420±10   | - | - |
| R2.RD5 | <i>E. coli</i> | 2.4±0.1  | 0.9±0.1 | 2.2±0.1  | 0.0±0.0 | 14±1     | 1.3±0.1 | 44±2     | 15±1     | 0.8±0.1 | 3.9±0.2 | 430±10   | - | - |
| R3.M1  | <i>E. coli</i> | 15±4     | 6±2     | 35±7     | 14±4    | 14±4     | 5±2     | 6±2      | 3.8±0.8  | 0.1±0.0 | 1.4±0.4 | 3500±400 | - | - |
| R3.M2  | <i>E. coli</i> | 26±5     | 3.2±0.7 | 13±3     | 9±2     | 21±4     | 4.4±0.8 | 11±3     | 11±2     | 0.1±0.0 | 1.6±0.5 | 4100±400 | - | - |
| R3.M3  | <i>E. coli</i> | 25±6     | 3±1     | 19±5     | 5±1     | 23±7     | 4±1     | 12±4     | 7±2      | 0.2±0.1 | 3±1     | 2300±300 | - | - |
| R3.M4  | <i>E. coli</i> | 50±3     | 3.9±0.5 | 9±1      | 5.6±0.7 | 13±1     | 1.8±0.2 | 8.9±0.7  | 5.8±0.5  | 0.1±0.0 | 1.7±0.1 | 4300±300 | - | - |
| R3.M5  | <i>E. coli</i> | 3±1      | 0.7±0.6 | 2.5±0.5  | 0.0±0.0 | 17±3     | 0.9±0.2 | 53±5     | 13±2     | 7±7     | 3.7±0.5 | 380±40   | - | - |
| R3.M6  | <i>E. coli</i> | 9.4±0.8  | 1.4±0.1 | 11.9±0.8 | 4.3±0.3 | 36±2     | 6.3±0.6 | 12.2±0.9 | 16±1     | 0.2±0.0 | 2.5±0.2 | 3400±100 | - | - |
| R3.M7  | <i>E. coli</i> | 20±9     | 6±3     | 29±10    | 11±5    | 16±7     | 4±2     | 7±3      | 5±2      | 0.1±0.1 | 1.7±0.8 | 3100±600 | - | - |
| R3.M8  | <i>E. coli</i> | 16±2     | 6.1±0.9 | 33±4     | 14±2    | 13±2     | 5.4±0.9 | 7±1      | 4.1±0.9  | 0.1±0.0 | 1.8±0.4 | 3900±200 | - | - |
| R3.M9  | <i>E. coli</i> | 21±3     | 4.7±0.4 | 22±2     | 7.7±0.8 | 21±2     | 4.1±0.4 | 11±2     | 6.3±0.9  | 0.2±0.0 | 2.9±0.4 | 2500±100 | - | - |
| R3.M10 | <i>E. coli</i> | 3±1      | 1.0±0.3 | 1.8±0.6  | 0.0±0.0 | 15±5     | 0.8±0.3 | 58±9     | 15±5     | 1.0±0.3 | 4±2     | 390±70   | - | - |
| R3.RD1 | <i>E. coli</i> | 20±20    | 4±3     | 20±10    | 7±4     | 20±30    | 4±5     | 10±10    | 10±10    | 0.2±0.2 | 2±4     | 1300±600 | - | - |
| R3.RD2 | <i>E. coli</i> | 19.2±0.4 | 4.8±0.1 | 20.5±0.6 | 7.3±0.2 | 24.7±0.6 | 4.3±0.1 | 11±1     | 6.5±0.3  | 0.2±0.0 | 2.0±0.1 | 1980±30  | - | - |
| R3.RD3 | <i>E. coli</i> | 10±3     | 3±1     | 35±9     | 13±5    | 18±6     | 6±3     | 7±3      | 6±2      | 0.1±0.0 | 1.5±0.6 | 3300±500 | - | - |
| R3.RD4 | <i>E. coli</i> | 13±1     | 2.1±0.1 | 22±1     | 7.3±0.3 | 29±2     | 6.9±0.4 | 9±1      | 7.9±0.6  | 0.1±0.0 | 1.8±0.2 | 4600±100 | - | - |
| R3.RD5 | <i>E. coli</i> | 21±4     | 5±1     | 21±4     | 8±2     | 25±5     | 5±1     | 8±2      | 6±2      | 0.1±0.0 | 1.8±0.5 | 2700±300 | - | - |
| R4.M1  | <i>E. coli</i> | 10.6±0.4 | 2.6±0.2 | 13.0±0.9 | 4.1±0.4 | 34±1     | 5.2±0.5 | 14.3±0.4 | 11.5±0.7 | 0.0±0.0 | 2.2±0.1 | 2850±60  | - | - |
| R4.M2  | <i>E. coli</i> | 23±1     | 4.1±0.2 | 12.3±0.3 | 9.0±0.3 | 24±1     | 4.2±0.1 | 10.6±0.7 | 11.5±0.6 | 0.0±0.0 | 1.3±0.1 | 3430±70  | - | - |
| R4.M3  | <i>E. coli</i> | 3.1±0.2  | 0.9±0.0 | 9.1±0.3  | 3.8±0.1 | 43.8±0.9 | 7.1±0.2 | 8.9±0.3  | 19.7±0.7 | 0.0±0.0 | 2.1±0.1 | 3370±60  | - | - |
| R4.M4  | <i>E. coli</i> | 6.8±0.6  | 1.2±0.1 | 8.8±0.9  | 3.9±0.4 | 42±3     | 6.2±0.6 | 8.4±0.8  | 19±2     | 0.0±0.0 | 1.8±0.3 | 4700±200 | - | - |
| R4.M5  | <i>E. coli</i> | 11±1     | 3.0±0.2 | 15±1     | 8.9±0.6 | 30±3     | 4.3±0.5 | 11±1     | 14±2     | 0.0±0.0 | 1.8±0.3 | 4700±200 | - | - |
| R4.M6  | <i>E. coli</i> | 6.0±0.6  | 2.3±0.2 | 12.5±0.8 | 5.9±0.4 | 38±2     | 6.5±0.5 | 8.3±0.6  | 17±1     | 0.0±0.0 | 2.0±0.2 | 3800±100 | - | - |
| R4.M7  | <i>E. coli</i> | 2.7±0.4  | 1.2±0.1 | 17±2     | 2.7±0.4 | 37±2     | 4.9±0.6 | 17.6±0.9 | 11.1±0.4 | 0.0±0.0 | 2.9±0.1 | 2200±70  | - | - |
| R4.M8  | <i>E. coli</i> | 12.0±0.8 | 2.4±0.1 | 18.6±0.7 | 6.7±0.3 | 29.7±0.9 | 5.2±0.2 | 13.2±0.6 | 10.2±0.4 | 0.0±0.0 | 1.9±0.1 | 2890±50  | - | - |
| R4.M9  | <i>E. coli</i> | 3.5±0.4  | 1.0±0.0 | 20±1     | 4.7±0.5 | 35.9±0.9 | 4.8±0.3 | 15.7±0.9 | 9.5±0.3  | 0.0±0.0 | 2.6±0.2 | 2550±60  | - | - |
| R4.M10 | <i>E. coli</i> | 10.7±0.4 | 2.6±0.1 | 8.3±0.3  | 5.5±0.4 | 28.3±0.8 | 6.6±0.3 | 17.9±0.5 | 15.7±0.4 | 0.0±0.0 | 2.0±0.1 | 2280±30  | - | - |
| R4.M11 | <i>E. coli</i> | 4.3±0.7  | 0.0±0.0 | 3.4±0.8  | 4.2±0.9 | 15±2     | 28±3    | 4.6±0.3  | 30±2     | 0.0±0.0 | 2.9±0.3 | 1110±60  | - | - |
| R4.M12 | <i>E. coli</i> | 14.5±0.5 | 0.0±0.0 | 3.6±0.2  | 0.0±0.0 | 17.5±0.8 | 0.0±0.0 | 35.9±0.7 | 12.8±0.3 | 0.0±0.0 | 3.3±0.1 | 660±10   | - | - |
| R4.M13 | <i>E. coli</i> | 37.9±0.8 | 3.1±0.1 | 4.7±0.2  | 4.4±0.2 | 17.0±0.6 | 4.7±0.2 | 13.4±0.6 | 12.2±0.3 | 0.0±0.0 | 1.5±0.1 | 2830±40  | - | - |
| R4.M14 | <i>E. coli</i> | 20.0±0.5 | 2.6±0.1 | 15.3±0.4 | 8.5±0.4 | 26±1     | 6.1±0.3 | 6.5±0.3  | 12.7±0.8 | 0.0±0.0 | 1.1±0.1 | 2910±50  | - | - |
| R4.M15 | <i>E. coli</i> | 33.2±0.7 | 3.6±0.2 | 6.0±0.4  | 5.8±0.3 | 20±1     | 5.8±0.4 | 10.9±0.4 | 12.0±0.9 | 0.0±0.0 | 1.2±0.1 | 3490±70  | - | - |
| R4.M16 | <i>E. coli</i> | 9.6±0.4  | 1.5±0.1 | 8.9±0.4  | 3.7±0.2 | 39.3±0.9 | 4.9±0.2 | 11.5±0.3 | 16.5±0.6 | 0.0±0.0 | 2.0±0.1 | 4000±70  | - | - |

|         |                |          |         |          |          |          |         |          |          |         |         |          |   |   |
|---------|----------------|----------|---------|----------|----------|----------|---------|----------|----------|---------|---------|----------|---|---|
| R4.M17  | <i>E. coli</i> | 18±1     | 2.0±0.2 | 10.9±0.9 | 7.5±0.5  | 26±1     | 6.8±0.5 | 13.3±0.4 | 12.8±0.7 | 0.0±0.0 | 1.6±0.1 | 3050±80  | - | - |
| R4.M18  | <i>E. coli</i> | 15±1     | 1.7±0.1 | 9.2±0.6  | 6.2±0.3  | 28.0±0.9 | 6.8±0.3 | 14.4±0.5 | 14.9±0.5 | 0.0±0.0 | 1.7±0.1 | 3150±60  | - | - |
| R4.RD1  | <i>E. coli</i> | 18±2     | 2.6±0.1 | 8.7±0.4  | 6.7±0.3  | 29±1     | 4.1±0.2 | 12.7±0.8 | 16.2±0.8 | 0.0±0.0 | 1.7±0.1 | 3230±90  | - | - |
| R4.RD2  | <i>E. coli</i> | 35±1     | 5.2±0.1 | 16.4±0.4 | 12.7±0.3 | 16.8±0.3 | 3.5±0.1 | 3.9±0.2  | 5.5±0.2  | 0.0±0.0 | 0.8±0.1 | 3800±60  | - | - |
| R4.RD3  | <i>E. coli</i> | 39±1     | 5.0±0.2 | 10.8±0.5 | 8.4±0.2  | 19.5±0.7 | 3.5±0.1 | 6.1±0.5  | 7.2±0.4  | 0.0±0.0 | 1.0±0.1 | 3500±60  | - | - |
| R4.RD4  | <i>E. coli</i> | 22±2     | 3.0±0.2 | 7.9±0.6  | 6.6±0.4  | 21±2     | 5.0±0.3 | 17±1     | 13.5±0.9 | 0.0±0.0 | 2.0±0.2 | 2690±90  | - | - |
| R4.RD5  | <i>E. coli</i> | 34±2     | 5.6±0.3 | 7.7±0.3  | 7.7±0.3  | 15.4±0.5 | 4.3±0.1 | 12.6±0.6 | 9.3±0.3  | 0.0±0.0 | 1.5±0.1 | 2910±90  | - | - |
| R4.RD6  | <i>E. coli</i> | 29.5±0.6 | 4.5±0.2 | 7.2±0.3  | 6.7±0.4  | 16.9±0.4 | 4.1±0.2 | 15.7±0.6 | 10.2±0.7 | 0.0±0.0 | 1.8±0.1 | 2400±30  | - | - |
| R4.RD7  | <i>E. coli</i> | 3.4±0.4  | 1.6±0.2 | 13.3±0.5 | 0.8±0.1  | 12±1     | 1.1±0.2 | 10.0±0.4 | 43±1     | 0.7±0.0 | 3.7±0.4 | 540±10   | - | - |
| R4.RD8  | <i>E. coli</i> | 9.1±0.6  | 2.5±0.1 | 21±1     | 6.5±0.3  | 31±2     | 5.0±0.3 | 11±1     | 12±1     | 0.0±0.0 | 2.0±0.3 | 4100±200 | - | - |
| R4.RD9  | <i>E. coli</i> | 6.5±0.2  | 2.0±0.0 | 21.4±0.4 | 11.9±0.3 | 27.9±0.5 | 6.6±0.2 | 8.4±0.2  | 11.8±0.5 | 0.0±0.0 | 1.2±0.0 | 2420±30  | - | - |
| R4.RD10 | <i>E. coli</i> | 4.5±0.2  | 1.3±0.0 | 27.1±0.6 | 10.6±0.2 | 28.3±0.8 | 8.4±0.2 | 6.6±0.3  | 9.8±0.4  | 0.0±0.0 | 1.2±0.1 | 2570±40  | - | - |
| R4.RD11 | <i>E. coli</i> | 4.8±0.6  | 0.0±0.0 | 26±3     | 10±1     | 26±2     | 7.5±0.8 | 15±1     | 10.3±0.7 | 0.0±0.0 | 1.6±0.1 | 1670±80  | - | - |
| RM.M1   | <i>E. coli</i> | 4.5      | 1.6     | 15.2     | 4.4      | 47.7     | 6.1     | 15.8     | 0.2      | 0.1     | 3.2     | 3100     | a | - |
| RM.M2   | <i>E. coli</i> | 3.9      | 1.2     | 21.0     | 8.4      | 34.6     | 8.2     | 17.9     | 0.3      | 0.2     | 2.3     | 1700     | a | - |
| RM.M3   | <i>E. coli</i> | 2.6      | 0.7     | 17.9     | 5.8      | 41.0     | 7.2     | 19.7     | 0.2      | 0.2     | 2.8     | 2500     | a | - |
| RM.M4   | <i>E. coli</i> | 1.4      | 0.6     | 15.0     | 2.8      | 54.7     | 3.4     | 13.1     | 0.3      | 0.4     | 5.4     | 1100     | a | - |
| RM.M5   | <i>E. coli</i> | 4.0      | 2.4     | 3.8      | nd       | 21.9     | nd      | 5.2      | nd       | 2.1     | 3.2     | 120      | a | - |
| RM.M6   | <i>E. coli</i> | 4.9      | 1.3     | 10.9     | 3.7      | 49.4     | 6.4     | 19.1     | 0.2      | 0.1     | 2.8     | 3100     | a | - |
| RM.M7   | <i>E. coli</i> | 2.5      | 0.7     | 16.8     | 5.5      | 42.2     | 6.2     | 20.7     | 0.2      | 0.2     | 2.9     | 2300     | a | - |
| RM.M8   | <i>E. coli</i> | 3.9      | 1.0     | 18.6     | 7.2      | 35.9     | 8.1     | 19.4     | 0.3      | 0.3     | 3.1     | 1500     | a | - |
| RM.M9   | <i>E. coli</i> | 3.4      | 2.3     | 4.2      | nd       | 24.6     | nd      | 7.6      | nd       | 1.8     | 2.6     | 130      | a | - |
| RM.M10  | <i>E. coli</i> | 2.9      | 1.0     | 19.0     | 7.5      | 35.0     | 8.1     | 20.0     | 0.6      | 0.3     | 3.2     | 1200     | a | - |
| RM.M11  | <i>E. coli</i> | 4.1      | 2.4     | 3.9      | nd       | 23.8     | nd      | 5.2      | 1.8      | 1.8     | 2.9     | 120      | a | - |
| RM.M12  | <i>E. coli</i> | 5.5      | 1.2     | 18.6     | 3.5      | 48.9     | 3.7     | 12.7     | 0.1      | 0.2     | 4.4     | 3300     | a | - |
| RM.M13  | <i>E. coli</i> | 3.7      | nd      | 3.9      | nd       | 32.0     | nd      | 5.1      | 1.7      | 1.8     | 2.6     | 140      | a | - |
| RM.M14  | <i>E. coli</i> | 2.6      | 1.1     | 19.9     | 8.4      | 33.2     | 8.3     | 17.2     | 0.8      | 0.4     | 2.7     | 850      | a | - |
| RM.M15  | <i>E. coli</i> | 3.2      | 0.6     | 11.8     | 5.0      | 44.4     | 11.0    | 20.4     | 0.2      | 0.2     | 2.0     | 3300     | a | - |
| RM.M16  | <i>E. coli</i> | 3.2      | 1.1     | 19.5     | 7.7      | 35.2     | 8.0     | 18.2     | 0.5      | 0.4     | 2.7     | 1100     | a | - |
| RM.M17  | <i>E. coli</i> | 3.0      | 0.9     | 15.6     | 5.8      | 41.0     | 7.5     | 20.6     | 0.4      | 0.2     | 2.6     | 1600     | a | - |
| RM.M18  | <i>E. coli</i> | 3.2      | 1.1     | 19.1     | 7.3      | 36.5     | 8.3     | 18.1     | 0.4      | 0.4     | 2.6     | 1200     | a | - |
| RM.M19  | <i>E. coli</i> | 3.4      | 1.0     | 19.3     | 7.3      | 35.2     | 7.5     | 19.9     | 0.6      | 0.4     | 3.2     | 1300     | a | - |
| RM.M20  | <i>E. coli</i> | 3.1      | 0.9     | 18.3     | 8.1      | 38.1     | 8.6     | 18.4     | 0.2      | 0.2     | 2.0     | 1600     | a | - |
| RM.M21  | <i>E. coli</i> | 2.5      | 0.7     | 16.6     | 3.6      | 49.3     | 5.5     | 15.9     | 0.1      | 0.2     | 4.2     | 3200     | a | - |
| RM.M22  | <i>E. coli</i> | 1.4      | 0.7     | 11.0     | 0.5      | 66.6     | 1.4     | 8.7      | 0.4      | 0.4     | 5.6     | 780      | a | - |
| RM.M23  | <i>E. coli</i> | 4.6      | 2.7     | 4.1      | nd       | 23.2     | nd      | 6.9      | nd       | 2.0     | 3.0     | 120      | a | - |
| RM.M24  | <i>E. coli</i> | 3.8      | 1.6     | 7.5      | nd       | 41.8     | 1.1     | 6.3      | 1.1      | 1.2     | 1.5     | 200      | a | - |
| RM.M25  | <i>E. coli</i> | 2.7      | 0.9     | 23.4     | 4.1      | 45.9     | 4.4     | 14.2     | 0.1      | 0.1     | 2.9     | 3800     | a | - |

|          |                     |          |         |         |         |         |         |         |         |     |     |         |   |   |
|----------|---------------------|----------|---------|---------|---------|---------|---------|---------|---------|-----|-----|---------|---|---|
| RM.M26   | <i>E. coli</i>      | 3.9      | 2.5     | 3.6     | nd      | 20.3    | nd      | 6.2     | nd      | 2.3 | 3.1 | 110     | a | - |
| RM.M27   | <i>E. coli</i>      | 3.4      | 0.8     | 19.1    | 4.8     | 46.6    | 6.9     | 13.7    | 0.1     | 0.1 | 3.5 | 3600    | a | - |
| RM.M28   | <i>E. coli</i>      | 3.9      | 2.4     | 3.1     | nd      | 18.9    | nd      | 6.2     | 1.8     | 2.2 | 3.0 | 110     | a | - |
| RM.M29   | <i>E. coli</i>      | 21.9     | 1.7     | 16.3    | 2.7     | 38.0    | 3.0     | 11.3    | 0.2     | 0.2 | 3.8 | 2500    | a | - |
| RM.M30   | <i>E. coli</i>      | 3.5      | 0.8     | 17.9    | 7.0     | 39.8    | 7.4     | 19.0    | 0.2     | 0.2 | 2.2 | 2000    | a | - |
| RM.M31   | <i>E. coli</i>      | 5.9      | 1.6     | 7.9     | 2.1     | 43.9    | 6.3     | 13.0    | 0.5     | 1.0 | 4.1 | 400     | a | - |
| RM.M32   | <i>E. coli</i>      | 2.9      | 0.9     | 17.6    | 6.3     | 40.3    | 7.0     | 19.1    | 0.5     | 0.3 | 2.6 | 1700    | a | - |
| RM.M33   | <i>E. coli</i>      | 4.9      | 2.3     | 4.0     | nd      | 21.6    | nd      | 6.5     | nd      | 1.9 | 2.7 | 120     | a | - |
| RM.M34   | <i>E. coli</i>      | 3.1      | 1.0     | 20.9    | 7.8     | 36.4    | 8.2     | 17.8    | 0.2     | 0.3 | 2.2 | 1600    | a | - |
| RM.M35   | <i>E. coli</i>      | 3.5      | 1.0     | 16.4    | 7.5     | 38.1    | 7.4     | 18.0    | 0.6     | 0.5 | 2.7 | 920     | a | - |
| RM.M36   | <i>E. coli</i>      | 3.2      | 1.1     | 21.7    | 7.4     | 38.9    | 6.6     | 17.8    | 0.1     | 0.1 | 1.9 | 2500    | a | - |
| RM.M37   | <i>E. coli</i>      | 3.4      | 1.2     | 20.5    | 7.7     | 35.1    | 7.9     | 16.9    | 0.5     | 0.4 | 2.5 | 1000    | a | - |
| RM.M38   | <i>E. coli</i>      | 2.2      | 0.8     | 19.1    | 5.3     | 43.0    | 6.2     | 18.9    | 0.2     | 0.2 | 3.0 | 2700    | a | - |
| RM.M39   | <i>E. coli</i>      | 4.9      | 2.3     | 31.6    | 12.4    | 28.1    | 6.9     | 10.4    | 0.3     | 0.2 | 1.9 | 2100    | a | - |
| RM.M40   | <i>E. coli</i>      | 2.5      | 0.8     | 19.1    | 3.9     | 48.3    | 5.0     | 15.8    | 0.1     | 0.1 | 3.5 | 3500    | a | - |
| RM.M41   | <i>E. coli</i>      | 2.2      | 0.7     | 18.6    | 5.7     | 43.8    | 7.3     | 17.7    | 0.3     | 0.2 | 2.6 | 3200    | a | - |
| RM.M42   | <i>E. coli</i>      | 5.0      | 1.1     | 9.2     | 4.7     | 42.8    | 15.5    | 18.7    | 0.2     | 0.2 | 1.4 | 3500    | a | - |
| RM.M43   | <i>E. coli</i>      | 3.5      | 1.1     | 20.0    | 7.8     | 35.4    | 8.6     | 16.8    | 0.5     | 0.4 | 2.4 | 960     | a | - |
| RM.M44   | <i>E. coli</i>      | 3.2      | 1.0     | 20.0    | 7.6     | 37.3    | 8.2     | 17.7    | 0.3     | 0.3 | 2.3 | 1500    | a | - |
| RM.M45   | <i>E. coli</i>      | 4.3      | 2.4     | 3.9     | nd      | 21.7    | nd      | 6.7     | 1.8     | 2.3 | 2.7 | 120     | a | - |
| RM.M46   | <i>E. coli</i>      | 4.6      | 2.6     | 3.9     | nd      | 22.0    | nd      | 6.5     | nd      | 2.0 | 2.7 | 110     | a | - |
| RM.M47   | <i>E. coli</i>      | 1.4      | 0.7     | 10.4    | 0.5     | 63.6    | 1.2     | 8.0     | 0.6     | 0.5 | 6.9 | 540     | a | - |
| RM.M48   | <i>E. coli</i>      | 1.9      | 0.7     | 18.5    | 5.4     | 43.6    | 7.0     | 18.6    | 0.3     | 0.2 | 2.7 | 2700    | a | - |
| RM.M49   | <i>E. coli</i>      | 2.6      | 1.5     | 8.8     | nd      | 51.2    | 1.1     | 6.5     | nd      | 1.4 | 1.5 | 210     | a | - |
| RM.M50   | <i>E. coli</i>      | 4.5      | 2.4     | 3.6     | nd      | 21.4    | nd      | 6.3     | nd      | 2.0 | 2.6 | 120     | a | - |
| RM.M51   | <i>E. coli</i>      | 4.5      | 2.4     | 3.7     | nd      | 21.8    | nd      | 6.3     | nd      | 2.1 | 2.7 | 120     | a | - |
| RM.M52   | <i>E. coli</i>      | 3.1      | 1.1     | 19.3    | 7.2     | 37.5    | 7.7     | 19.2    | 0.2     | 0.3 | 2.4 | 1400    | a | - |
| RM.M53   | <i>E. coli</i>      | 3.1      | 1.4     | 18.4    | 7.4     | 32.9    | 8.1     | 17.2    | 0.4     | 0.6 | 3.5 | 550     | a | - |
| RM.M54   | <i>E. coli</i>      | 3.9      | 2.1     | 3.9     | nd      | 30.3    | nd      | 6.7     | nd      | 1.7 | 2.4 | 130     | a | - |
| RM.M55   | <i>E. coli</i>      | 2.9      | 1.1     | 20.6    | 8.0     | 35.3    | 8.1     | 17.6    | 0.5     | 0.4 | 2.5 | 1100    | a | - |
| RM.M56   | <i>E. coli</i>      | 4.3      | 1.6     | 20.1    | 7.8     | 27.1    | 7.0     | 16.9    | 0.4     | 0.7 | 4.0 | 540     | a | - |
| RM.M57   | <i>E. coli</i>      | 4.4      | 3.7     | 23.0    | 19.3    | 27.9    | 5.5     | 12.9    | 0.1     | 0.2 | 1.6 | 1900    | a | - |
| RM.M58   | <i>E. coli</i>      | 2.8      | 1.3     | 21.9    | 8.5     | 33.0    | 7.6     | 17.6    | 0.3     | 0.5 | 2.8 | 930     | a | - |
| RM.M59   | <i>E. coli</i>      | 4.3      | 1.1     | 12.7    | 5.1     | 42.8    | 7.7     | 21.4    | 0.2     | 0.2 | 2.3 | 1600    | a | - |
| RM.M60   | <i>E. coli</i>      | 2.8      | 0.9     | 23.0    | 6.8     | 38.5    | 6.6     | 17.5    | 0.3     | 0.1 | 2.4 | 2900    | a | - |
| RM.M61   | <i>E. coli</i>      | 4.3      | 1.6     | 20.2    | 8.2     | 29.8    | 7.4     | 15.6    | 0.6     | 0.7 | 3.7 | 570     | a | - |
| AAC49179 | <i>C. palustris</i> | 97.5±0.2 | 0.9±0.1 | 0.6±0.1 | 0.2±0.0 | 0.2±0.1 | 0.2±0.0 | nd      | 0.1±0.1 | nd  | nd  | 710±50  | - | 2 |
| AAB71731 | <i>U. americana</i> | 44±3     | 23±1    | 3.7±0.4 | 7.9±0.9 | 9.8±0.8 | 1.5±0.2 | 1.4±0.1 | 4.4±0.7 | nd  | nd  | 1100±60 | - | 2 |

|          |                            |          |         |         |          |          |          |         |         |         |         |          |       |               |
|----------|----------------------------|----------|---------|---------|----------|----------|----------|---------|---------|---------|---------|----------|-------|---------------|
| AAG43857 | <i>I. germanica</i>        | 3.3±0.4  | 0.5±0.1 | 0.7±0.1 | 1.0±0.1  | 30±3     | 0.3±0.1  | 20±3    | 44±4    | nd      | nd      | 260±20   | -     | <sup>2</sup>  |
| AAG43858 | <i>I. germanica</i>        | 8±4      | nd      | 1±1     | nd       | 30±10    | nd       | 20±10   | 40±20   | nd      | nd      | 15±5     | -     | <sup>2</sup>  |
| EER87824 | <i>S. bicolor</i>          | 4.8±0.7  | 0.2±0.0 | 1.6±0.3 | 0.4±0.1  | 46±5     | nd       | 13±3    | 35±6    | nd      | nd      | 130±10   | -     | <sup>2</sup>  |
| EER88593 | <i>S. bicolor</i>          | 6±1      | 0.7±0.1 | 3.2±0.5 | 0.6±0.3  | 45±5     | 3.3±0.9  | 11±2    | 31±4    | nd      | nd      | 91±8     | -     | <sup>2</sup>  |
| AEM72519 | <i>C. nucifera</i>         | 14±3     | 1.1±0.3 | 1.4±0.3 | 1.1±0.1  | 44±5     | 0.4±0.3  | 6±1     | 31±5    | nd      | nd      | 130±10   | -     | <sup>2</sup>  |
| AEM72520 | <i>C. nucifera</i>         | 1.7±0.2  | 0.1±0.0 | 1.0±0.2 | 0.3±0.1  | 36±3     | 0.7±0.1  | 16±2    | 44±3    | nd      | nd      | 570±30   | -     | <sup>2</sup>  |
| AEM72521 | <i>C. nucifera</i>         | 11.1±0.8 | 1.2±0.1 | 34±2    | 6.1±0.6  | 14±2     | 23±3     | 2±1     | 9±3     | nd      | nd      | 200±10   | -     | <sup>2</sup>  |
| AEM72522 | <i>C. viscosissima</i>     | 52±6     | 26±5    | 7±2     | 6±2      | 7±2      | 0.9±0.6  | nd      | nd      | nd      | nd      | 79±10    | -     | <sup>2</sup>  |
| AEM72523 | <i>C. viscosissima</i>     | 4±1      | 0.5±0.2 | 1.0±0.3 | 0.9±0.4  | 47±2     | 0.7±0.5  | 26±2    | 19±2    | nd      | nd      | 249±9    | -     | <sup>2</sup>  |
| AEM72524 | <i>C. viscosissima</i>     | 7±5      | 5±3     | 2±2     | 2±2      | 84±6     | nd       | nd      | nd      | nd      | nd      | 19±2     | -     | <sup>2</sup>  |
| AAD42220 | <i>E. guineensis</i>       | 14±4     | 1.9±0.8 | 2±1     | 2±1      | 47±5     | 3±3      | nd      | 26±5    | nd      | nd      | 37±4     | -     | <sup>2</sup>  |
| EDQ65090 | <i>P. patens</i>           | 9±1      | 0.4±0.1 | 0.4±0.1 | 0.2±0.0  | 42±4     | 0.2±0.1  | 16±3    | 32±4    | nd      | nd      | 380±30   | -     | <sup>2</sup>  |
| EER96252 | <i>S. bicolor</i>          | 5.8±0.9  | 1.8±0.8 | 1.2±0.3 | 1.1±0.4  | 34±3     | 0.9±0.2  | 18±3    | 37±3    | nd      | nd      | 180±10   | -     | <sup>2</sup>  |
| EES11622 | <i>S. bicolor</i>          | 5±3      | nd      | nd      | nd       | 50±10    | nd       | 15±8    | 29±9    | nd      | nd      | 9±2      | -     | <sup>2</sup>  |
| EEH52851 | <i>M. pusilla</i>          | 4±2      | nd      | 0±1     | 0.6±0.1  | 65±4     | 8±4      | nd      | 23±3    | nd      | nd      | 16±2     | -     | <sup>2</sup>  |
| ACL08376 | <i>D. vulgaris</i>         | 29±1     | 3.5±0.2 | 7.9±0.3 | 24±1     | 6.0±0.4  | 24±1     | 1.2±0.4 | 2.6±0.3 | nd      | nd      | 330±9    | -     | <sup>2</sup>  |
| CAH09236 | <i>B. fragilis</i>         | 20±2     | 2.7±0.2 | 3.6±0.4 | 19±1     | 5.1±0.3  | 25±1     | 2.2±0.3 | 5.4±0.4 | nd      | nd      | 215±6    | -     | <sup>2</sup>  |
| ABR43801 | <i>P. distasonis</i>       | 18±5     | 6.3±0.4 | 16±1    | 9.3±0.8  | 21±2     | 27±2     | nd      | nd      | nd      | nd      | 70±4     | -     | <sup>2</sup>  |
| AAO77182 | <i>B. thetaiotaomicron</i> | 13.4±0.8 | 2.1±0.2 | 4.6±0.7 | 16.7±0.9 | 6±1      | 26±1     | nd      | 2.6±0.3 | nd      | nd      | 60±3     | -     | <sup>2</sup>  |
| ABG82470 | <i>C. perfringens</i>      | 70±4     | 3.0±0.5 | nd      | 1.1±0.2  | nd       | 9±2      | nd      | nd      | nd      | nd      | 72±10    | -     | <sup>2</sup>  |
| EEG55387 | <i>C. asparagiforme</i>    | 26±6     | 6±1     | 7±2     | 1.6±0.8  | 35±9     | 18±6     | nd      | 1.3±0.9 | nd      | nd      | 26±4     | -     | <sup>2</sup>  |
| EET61113 | <i>M. formatexigens</i>    | 31.8±0.3 | 5.1±0.1 | 4.3±0.2 | 8.9±0.5  | 1.9±0.2  | 10.5±0.2 | 0.4±0.2 | 1.2±0.1 | nd      | nd      | 381±3    | -     | <sup>2</sup>  |
| EDV77528 | <i>G. sp.</i>              | 9±4      | 2±1     | 7±3     | 30±10    | 11±3     | 32±8     | 0±1     | 2±1     | nd      | nd      | 60±10    | -     | <sup>2</sup>  |
| BAH81730 | <i>S. dysgalactiae</i>     | 30±1     | 5.0±0.2 | 5.7±0.3 | 13.5±0.7 | 4.4±0.3  | 20±1     | 0.3±0.1 | 3.3±0.1 | nd      | nd      | 620±10   | -     | <sup>2</sup>  |
| ABJ63754 | <i>L. brevis</i>           | 55.5±0.7 | 2.6±0.1 | 3.8±0.1 | 7.9±0.2  | 1.9±0.1  | 6.3±0.2  | nd      | 0.7±0.1 | nd      | nd      | 710±10   | -     | <sup>2</sup>  |
| CAD63310 | <i>L. plantarum</i>        | 68.0±0.8 | 1.2±0.1 | 2.8±0.2 | 4.6±0.2  | 1.9±0.1  | 6.9±0.4  | nd      | 0.5±0.1 | nd      | nd      | 440±10   | -     | <sup>2</sup>  |
| EEL82564 | <i>A. tetradus</i>         | 87±2     | 2.2±0.3 | 1.1±0.2 | 2.8±0.5  | 1.2±0.2  | 3.0±0.5  | 0.1±0.1 | 0.7±0.1 | nd      | nd      | 1400±100 | -     | <sup>2</sup>  |
| CAE80300 | <i>B. bacteriovorus</i>    | 37±3     | 3.3±0.5 | 6.7±0.7 | 7.6±0.6  | 8.2±0.7  | 28±2     | 1.6±0.2 | 6.6±0.5 | nd      | nd      | 330±20   | -     | <sup>2</sup>  |
| ABN54268 | <i>R. thermocellum</i>     | 8.4±0.4  | 4.5±0.2 | 2.7±0.2 | 7.9±0.4  | 9.8±0.8  | 60±1     | 0.8±0.7 | 4.7±0.4 | nd      | nd      | 98±3     | -     | <sup>2</sup>  |
| Q9SJE2   | <i>A. thaliana</i>         | nd       | nd      | nd      | nd       | 19.4     | nd       | 53.0    | 14.9    | 1.0     | 10.9    | 100      | a,c   | <sup>3</sup>  |
| AAX51637 | <i>M. longifolia</i>       | nd       | nd      | nd      | nd       | 7±4      | nd       | 66±5    | 15±2    | 10±3    | nd      | nd       | b,c,d | <sup>4</sup>  |
| AAX51636 | <i>D. butyracea</i>        | nd       | nd      | nd      | nd       | 17.8±0.6 | nd       | 71±4    | 0.6±0.1 | 2.6±0.1 | 5.2±0.4 | nd       | b     | <sup>5</sup>  |
| AHF72806 | <i>L. communis</i>         | nd       | 6±2     | 17±6    | nd       | 16±2     | nd       | 17±2    | 20±3    | 1.5±0.2 | 15±2    | nd       | b     | <sup>6</sup>  |
| EST75919 | <i>E. coli</i>             | 2.7      | 0.8     | 12.8    | 2.2      | 49.5     | 2.6      | 11.9    | 11.9    | 0.9     | 4.0     | 1400     | a,b   | <sup>7</sup>  |
| AAC49151 | <i>C. camphorum</i>        | nd       | nd      | 5.8     | 0.6      | 27.6     | 12.4     | 24.2    | 16.9    | 1.2     | 11.3    | 1600     | a     | <sup>8</sup>  |
| Q41635   | <i>U. californica</i>      | nd       | nd      | 63.2    | 13.7     | 3.0      | 10.2     | 1.6     | 4.3     | nd      | 4.0     | 1000     | a,b   | <sup>9</sup>  |
| ADB79567 | <i>A. hypogaea L.</i>      | nd       | nd      | 4±1     | nd       | 8±2      | nd       | 45±3    | 14±3    | 2.3±0.3 | 5.8±0.9 | nd       | b     | <sup>10</sup> |
| AAX51636 | <i>D. butyracea</i>        | nd       | nd      | 8.3     | nd       | 6.8      | nd       | 43.6    | 5.1     | 29.7    | 6.5     | 580±40   | a,b   | <sup>11</sup> |

|             |                        |         |         |         |         |         |      |          |          |         |          |            |     |               |
|-------------|------------------------|---------|---------|---------|---------|---------|------|----------|----------|---------|----------|------------|-----|---------------|
| Q9SQI3      | <i>G. hirsutum</i>     | nd      | nd      | 0.1     | nd      | 35.6    | nd   | 21.3     | 36.6     | 1.4     | 4.9      | 3100±200   | a,b | <sup>11</sup> |
| XP002515564 | <i>R. communis</i>     | nd      | nd      | 0.1     | nd      | 44.4    | nd   | 17.0     | 32.9     | 1.2     | 4.4      | 9200±100   | a,b | <sup>11</sup> |
| ABU96744    | <i>J. curcas</i>       | nd      | nd      | 0.0     | nd      | 44.4    | nd   | 17.5     | 32.5     | 1.2     | 4.4      | 8700±200   | a,b | <sup>11</sup> |
| WP004921669 | <i>A. baylyi</i>       | 20±7    | 9±2     | 15±2    | 8.0±0.3 | 17±1    | 6±1  | 8±2      | 10±4     | 2.3±0.1 | 1.6±0.4  | 18000±2000 | b   | <sup>12</sup> |
| CAA57794    | <i>A. brasilense</i>   | nd      | nd      | nd      | nd      | 5.6±0.3 | nd   | 53±3     | 9.2±0.6  | 0.9±0.0 | 29±2     | nd         | b   | <sup>13</sup> |
| EEC51251    | <i>P. tricornutum</i>  | nd      | nd      | nd      | nd      | 2.8±0.2 | nd   | 43.0±0.2 | 14.4±0.3 | 2.2±0.3 | 14.2±0.0 | nd         | b   | <sup>14</sup> |
| AAL79361    | <i>H. annuus L.</i>    | nd      | nd      | nd      | nd      | nd      | nd   | 39.9     | 3.6      | 21.6    | 10.9     | nd         | a   | <sup>15</sup> |
| ADA64920    | <i>L. lactis</i>       | 3.6±0.6 | 1.7±0.2 | 2.3±0.3 | nd      | 4.6±0.6 | nd   | 51±3     | 6.6±0.2  | 26±2    | 4.5±0.5  | 2800±100   | -   | <sup>16</sup> |
| AAC72882    | <i>C. hookeriana</i>   | 93.5    | 2.2     | 0.9     | 0.2     | 0.0     | 0.1  | 1.2      | 0.0      | nd      | 0.0      | 930        | a   | <sup>17</sup> |
| rTE3        | <i>C. viscosissima</i> | 42.5    | 26.6    | 4.1     | 9.5     | 1.4     | 1.6  | 1.3      | 0.8      | nd      | nd       | 510        | a   | <sup>17</sup> |
| rTE4        | <i>C. viscosissima</i> | 24.3    | 36.0    | 4.1     | 12.2    | 3.6     | 3.8  | 0.0      | 3.0      | nd      | nd       | 490        | a   | <sup>17</sup> |
| rTE8        | <i>C. viscosissima</i> | 17.9    | 10.2    | 3.4     | 5.3     | 31.6    | 6.4  | 0.0      | 17.9     | nd      | nd       | 87         | a   | <sup>17</sup> |
| rTE12       | <i>C. viscosissima</i> | 18.5    | 43.0    | 2.8     | 15.6    | 9.9     | 0.0  | 0.0      | 0.0      | nd      | nd       | 50         | a   | <sup>17</sup> |
| rTE15       | <i>C. viscosissima</i> | 4.1     | 21.0    | 14.7    | 34.3    | 5.1     | 10.0 | 0.0      | 0.0      | nd      | nd       | 56         | a   | <sup>17</sup> |
| rTE16       | <i>C. viscosissima</i> | 38.9    | 15.3    | 9.3     | 16.2    | 2.7     | 7.5  | 0.0      | 1.8      | nd      | nd       | 820        | a   | <sup>17</sup> |
| rTE20       | <i>C. viscosissima</i> | 16.1    | 19.9    | 12.4    | 24.3    | 2.8     | 13.2 | 0.0      | 2.2      | nd      | nd       | 390        | a   | <sup>17</sup> |
| rTE24       | <i>C. viscosissima</i> | 19.8    | 4.1     | 6.2     | 7.3     | 27.8    | 6.2  | 1.0      | 23.9     | nd      | nd       | 280        | a   | <sup>17</sup> |
| rTE28       | <i>C. viscosissima</i> | 4.8     | 1.0     | 1.3     | 1.7     | 41.4    | 1.8  | 2.3      | 44.8     | nd      | nd       | 280        | a   | <sup>17</sup> |
| rTE32       | <i>C. viscosissima</i> | 25.5    | 24.6    | 11.0    | 16.1    | 4.8     | 4.2  | 0.0      | 4.3      | nd      | nd       | 490        | a   | <sup>17</sup> |
| rTE36       | <i>C. viscosissima</i> | 6.9     | 18.5    | 13.1    | 17.6    | 11.7    | 17.4 | 0.0      | 9.2      | nd      | nd       | 190        | a   | <sup>17</sup> |
| rTE40       | <i>C. viscosissima</i> | 16.7    | 3.1     | 6.0     | 4.7     | 32.0    | 10.6 | 0.0      | 20.1     | nd      | nd       | 140        | a   | <sup>17</sup> |
| rTE44       | <i>C. viscosissima</i> | 6.8     | 1.7     | 1.3     | 1.1     | 46.4    | 5.8  | 0.0      | 31.3     | nd      | nd       | 47         | a   | <sup>17</sup> |
| rTE48       | <i>C. viscosissima</i> | 23.8    | 17.8    | 8.9     | 18.3    | 1.7     | 5.8  | 0.8      | 0.8      | nd      | nd       | 810        | a   | <sup>17</sup> |
| rTE51       | <i>C. viscosissima</i> | 0.0     | 20.9    | 2.4     | 30.0    | 21.8    | 2.1  | 0.0      | 0.0      | nd      | nd       | 6.4        | a   | <sup>17</sup> |
| rTE52       | <i>C. viscosissima</i> | 31.0    | 11.4    | 5.3     | 12.3    | 1.6     | 4.6  | 0.0      | 1.0      | nd      | nd       | 870        | a   | <sup>17</sup> |
| rTE56       | <i>C. viscosissima</i> | 24.9    | 5.6     | 7.5     | 8.2     | 26.2    | 4.6  | 0.8      | 14.8     | nd      | nd       | 410        | a   | <sup>17</sup> |
| rTE60       | <i>C. viscosissima</i> | 3.6     | 1.0     | 1.1     | 0.9     | 54.9    | 0.1  | 10.1     | 27.4     | nd      | nd       | 140        | a   | <sup>17</sup> |
| CvB2MT1     | <i>C. viscosissima</i> | 34.6    | 0.0     | 0.0     | 0.0     | 0.0     | 0.0  | 0.0      | 0.0      | nd      | nd       | 2.4        | a   | <sup>17</sup> |
| CvB2MT2     | <i>C. viscosissima</i> | 8.9     | 4.6     | 10.0    | 9.7     | 24.5    | 19.9 | 0.1      | 19.5     | nd      | nd       | 82         | a   | <sup>17</sup> |
| CvB2MT3     | <i>C. viscosissima</i> | 17.2    | 4.1     | 2.1     | 4.6     | 40.1    | 4.3  | 0.0      | 21.6     | nd      | nd       | 90         | a   | <sup>17</sup> |
| CvB2MT4     | <i>C. viscosissima</i> | 3.7     | 0.6     | 0.0     | 0.2     | 60.9    | 0.0  | 9.3      | 24.5     | nd      | nd       | 200        | a   | <sup>17</sup> |
| CvB2MT5     | <i>C. viscosissima</i> | 1.5     | 0.2     | 0.0     | 0.0     | 81.5    | 0.0  | 2.9      | 13.9     | nd      | nd       | 460        | a   | <sup>17</sup> |
| CvB2MT6     | <i>C. viscosissima</i> | 38.2    | 5.8     | 21.7    | 9.1     | 3.4     | 13.9 | 0.0      | 0.0      | nd      | nd       | 31         | a   | <sup>17</sup> |
| CvB2MT7     | <i>C. viscosissima</i> | 6.1     | 0.6     | 0.0     | 0.0     | 62.2    | 0.0  | 0.9      | 28.8     | nd      | nd       | 47         | a   | <sup>17</sup> |
| CvB2MT8     | <i>C. viscosissima</i> | 3.9     | 0.3     | 0.0     | 0.0     | 58.0    | 0.0  | 4.4      | 32.8     | nd      | nd       | 74         | a   | <sup>17</sup> |
| CvB2MT9     | <i>C. viscosissima</i> | 1.5     | 0.3     | 0.3     | 0.4     | 52.6    | 0.6  | 10.4     | 33.7     | nd      | nd       | 410        | a   | <sup>17</sup> |
| CvB2MT10    | <i>C. viscosissima</i> | 21.6    | 9.6     | 8.8     | 14.1    | 9.8     | 16.4 | 0.0      | 9.9      | nd      | nd       | 170        | a   | <sup>17</sup> |
| CvB2MT11    | <i>C. viscosissima</i> | 4.3     | 1.5     | 3.8     | 4.0     | 45.5    | 4.9  | 11.9     | 23.5     | nd      | nd       | 120        | a   | <sup>17</sup> |

|          |                        |      |      |      |      |      |      |      |      |    |     |      |   |    |
|----------|------------------------|------|------|------|------|------|------|------|------|----|-----|------|---|----|
| CvB2MT12 | <i>C. viscosissima</i> | 12.5 | 7.2  | 16.4 | 15.4 | 15.3 | 20.0 | 0.0  | 7.8  | nd | nd  | 150  | a | 17 |
| CvB2MT13 | <i>C. viscosissima</i> | 12.7 | 2.1  | 0.9  | 1.5  | 50.7 | 0.5  | 3.1  | 26.0 | nd | nd  | 180  | a | 17 |
| CvB2MT14 | <i>C. viscosissima</i> | 3.4  | 0.8  | 1.6  | 0.8  | 52.2 | 0.7  | 14.1 | 26.0 | nd | nd  | 110  | a | 17 |
| CvB2MT15 | <i>C. viscosissima</i> | 16.1 | 7.5  | 15.6 | 19.8 | 9.2  | 19.8 | 0.7  | 4.0  | nd | nd  | 150  | a | 17 |
| CvB2MT16 | <i>C. viscosissima</i> | 15.4 | 5.6  | 3.9  | 9.6  | 22.8 | 30.9 | 0.0  | 7.0  | nd | nd  | 310  | a | 17 |
| CvB2MT17 | <i>C. viscosissima</i> | 26.2 | 6.5  | 17.6 | 13.5 | 8.6  | 15.8 | 5.0  | 1.6  | nd | nd  | 110  | a | 17 |
| CvB2MT18 | <i>C. viscosissima</i> | 21.9 | 8.4  | 13.6 | 19.9 | 6.1  | 15.3 | 2.3  | 3.2  | nd | nd  | 300  | a | 17 |
| CvB2MT19 | <i>C. viscosissima</i> | 18.2 | 6.3  | 10.3 | 22.0 | 8.5  | 18.4 | 0.6  | 6.3  | nd | nd  | 170  | a | 17 |
| CvB2MT20 | <i>C. viscosissima</i> | 26.2 | 16.9 | 6.6  | 19.1 | 2.4  | 6.2  | 0.3  | 1.4  | nd | nd  | 690  | a | 17 |
| CvB2MT21 | <i>C. viscosissima</i> | 17.8 | 3.4  | 4.6  | 2.7  | 43.8 | 4.5  | 2.0  | 17.5 | nd | nd  | 200  | a | 17 |
| CvB2MT22 | <i>C. viscosissima</i> | 20.7 | 9.2  | 13.0 | 15.6 | 8.9  | 16.7 | 0.0  | 10.0 | nd | nd  | 85   | a | 17 |
| CvB2MT23 | <i>C. viscosissima</i> | 5.6  | 1.0  | 0.8  | 0.8  | 54.2 | 0.9  | 6.6  | 28.7 | nd | nd  | 380  | a | 17 |
| CvB2MT24 | <i>C. viscosissima</i> | 3.6  | 0.4  | 0.0  | 0.3  | 73.6 | 0.2  | 1.4  | 20.0 | nd | nd  | 400  | a | 17 |
| CvB2MT25 | <i>C. viscosissima</i> | 28.8 | 9.3  | 13.0 | 15.9 | 5.2  | 13.7 | 2.0  | 0.6  | nd | nd  | 290  | a | 17 |
| CvB2MT26 | <i>C. viscosissima</i> | 31.7 | 1.2  | 4.8  | 0.0  | 17.9 | 3.9  | 11.3 | 5.7  | nd | nd  | 41   | a | 17 |
| CvB2MT27 | <i>C. viscosissima</i> | 20.8 | 9.9  | 10.3 | 21.5 | 5.3  | 17.6 | 0.3  | 3.2  | nd | nd  | 230  | a | 17 |
| CvB2MT28 | <i>C. viscosissima</i> | 17.6 | 5.0  | 7.5  | 3.7  | 40.1 | 4.1  | 3.4  | 14.3 | nd | nd  | 330  | a | 17 |
| CvB2MT29 | <i>C. viscosissima</i> | 11.4 | 7.2  | 15.0 | 18.1 | 12.1 | 20.5 | 0.4  | 8.9  | nd | nd  | 290  | a | 17 |
| CvB2MT30 | <i>C. viscosissima</i> | 29.2 | 17.2 | 6.1  | 15.7 | 1.5  | 4.7  | 0.4  | 0.6  | nd | nd  | 1000 | a | 17 |
| CvB2MT31 | <i>C. viscosissima</i> | 17.9 | 5.9  | 9.0  | 19.6 | 12.1 | 17.3 | 0.7  | 8.1  | nd | nd  | 390  | a | 17 |
| CvB2MT32 | <i>C. viscosissima</i> | 21.5 | 7.3  | 4.8  | 14.4 | 9.5  | 30.6 | 0.0  | 3.4  | nd | nd  | 330  | a | 17 |
| CvB2MT33 | <i>C. viscosissima</i> | 27.2 | 7.9  | 9.6  | 20.4 | 5.1  | 12.5 | 0.0  | 3.6  | nd | nd  | 570  | a | 17 |
| CvB2MT34 | <i>C. viscosissima</i> | 31.8 | 9.6  | 9.2  | 18.4 | 2.8  | 11.2 | 0.3  | 0.4  | nd | nd  | 460  | a | 17 |
| CvB2MT35 | <i>C. viscosissima</i> | 43.1 | 2.5  | 3.6  | 4.1  | 3.0  | 8.8  | 0.0  | 0.1  | nd | nd  | 120  | a | 17 |
| CvB2MT36 | <i>C. viscosissima</i> | 40.3 | 0.0  | 0.0  | 0.0  | 2.4  | 0.0  | 0.0  | 0.0  | nd | nd  | 47   | a | 17 |
| CvB2MT37 | <i>C. viscosissima</i> | 40.2 | 3.4  | 2.8  | 1.0  | 1.1  | 2.0  | 0.0  | 0.2  | nd | nd  | 330  | a | 17 |
| CvB2MT38 | <i>C. viscosissima</i> | 37.2 | 3.1  | 5.7  | 4.2  | 1.6  | 8.1  | 0.0  | 0.0  | nd | nd  | 1000 | a | 17 |
| CvB2MT40 | <i>C. viscosissima</i> | 61.4 | 12.5 | 3.3  | 6.2  | 0.6  | 0.9  | 0.0  | 0.0  | nd | nd  | 1100 | a | 17 |
| CvB2MT41 | <i>C. viscosissima</i> | 36.2 | 3.8  | 1.4  | 0.7  | 0.0  | 0.0  | 0.0  | 0.0  | nd | nd  | 93   | a | 17 |
| CvB2MT42 | <i>C. viscosissima</i> | 27.0 | 15.0 | 6.9  | 18.9 | 2.6  | 6.1  | 1.5  | 1.1  | nd | nd  | 820  | a | 17 |
| CvB2MT43 | <i>C. viscosissima</i> | 4.1  | 1.2  | 1.5  | 1.4  | 47.0 | 0.7  | 11.5 | 31.0 | nd | nd  | 170  | a | 17 |
| CvB2MT44 | <i>C. viscosissima</i> | 22.7 | 23.6 | 7.9  | 24.2 | 1.8  | 4.0  | 0.0  | 0.2  | nd | nd  | 710  | a | 17 |
| CvB2MT45 | <i>C. viscosissima</i> | 22.5 | 15.8 | 13.1 | 24.4 | 2.6  | 11.4 | 0.0  | 0.0  | nd | nd  | 570  | a | 17 |
| CvB2MT47 | <i>C. viscosissima</i> | 18.5 | 12.0 | 17.9 | 17.5 | 1.4  | 4.5  | 22.6 | 0.0  | nd | nd  | 190  | a | 17 |
| CvB2MT48 | <i>C. viscosissima</i> | 13.7 | 38.6 | 6.7  | 17.5 | 0.0  | 3.9  | 0.2  | 0.0  | nd | nd  | 140  | a | 17 |
| TEGm157  | Hybrid                 | 12.0 | 0.7  | 4.0  | 0.5  | 30.9 | 4.6  | 19.1 | 19.2 | nd | 7.6 | 600  | a | 17 |
| TEGm162  | Hybrid                 | 38.5 | 5.3  | 11.7 | 2.2  | 19.4 | 11.6 | 3.1  | 0.6  | nd | 1.5 | 1700 | a | 17 |
| TEGm169  | Hybrid                 | 33.7 | 4.6  | 11.7 | 2.8  | 18.8 | 14.6 | 3.8  | 1.9  | nd | 2.7 | 1400 | a | 17 |

|           |                       |      |     |      |      |          |      |          |         |         |         |        |   |               |
|-----------|-----------------------|------|-----|------|------|----------|------|----------|---------|---------|---------|--------|---|---------------|
| TEGm171   | Hybrid                | 17.6 | 0.8 | 6.4  | 3.1  | 26.2     | 5.9  | 12.1     | 23.0    | nd      | 2.0     | 1100   | a | <sup>17</sup> |
| TEGm173   | Hybrid                | 2.8  | 0.4 | 3.5  | 0.5  | 35.9     | 3.1  | 12.0     | 36.2    | nd      | 4.9     | 1200   | a | <sup>17</sup> |
| TEGm181   | Hybrid                | 3.7  | 0.7 | 4.8  | 0.5  | 35.5     | 4.6  | 15.1     | 29.2    | nd      | 5.0     | 830    | a | <sup>17</sup> |
| TEGm183   | Hybrid                | 12.7 | 4.2 | 9.2  | 6.6  | 23.2     | 11.7 | 10.0     | 18.4    | nd      | 2.4     | 1200   | a | <sup>17</sup> |
| TEGm198   | Hybrid                | 1.3  | 0.1 | 1.4  | 0.1  | 36.4     | 0.7  | 23.0     | 36.6    | nd      | 0.0     | 710    | a | <sup>17</sup> |
| TEGm200   | Hybrid                | 1.8  | 0.4 | 4.7  | 3.7  | 19.2     | 8.3  | 16.6     | 41.5    | nd      | 3.5     | 940    | a | <sup>17</sup> |
| TEGm201   | Hybrid                | 1.3  | 0.1 | 1.2  | 0.1  | 19.3     | 1.3  | 28.4     | 41.1    | nd      | 7.0     | 590    | a | <sup>17</sup> |
| TEGm202   | Hybrid                | 2.8  | 0.3 | 4.0  | 0.8  | 30.1     | 2.9  | 17.9     | 36.4    | nd      | 4.0     | 1000   | a | <sup>17</sup> |
| TEGm203   | Hybrid                | 0.6  | 0.1 | 2.4  | 0.0  | 45.1     | 2.2  | 24.1     | 19.6    | nd      | 5.7     | 530    | a | <sup>17</sup> |
| TEGm204   | Hybrid                | 1.3  | 0.1 | 1.6  | 0.3  | 38.0     | 1.5  | 19.8     | 33.6    | nd      | 3.4     | 1200   | a | <sup>17</sup> |
| TEGm205   | Hybrid                | 0.3  | 0.0 | 0.7  | 0.0  | 35.9     | 1.1  | 23.9     | 34.1    | nd      | 3.9     | 890    | a | <sup>17</sup> |
| TEGm215   | Hybrid                | 9.0  | 0.7 | 5.6  | 1.7  | 30.6     | 6.5  | 15.2     | 24.3    | nd      | 3.7     | 980    | a | <sup>17</sup> |
| TEGm219   | Hybrid                | 2.4  | 0.3 | 4.4  | 0.2  | 54.7     | 3.8  | 16.1     | 17.5    | nd      | 0.0     | 530    | a | <sup>17</sup> |
| TEGm245   | Hybrid                | 1.0  | 0.0 | 0.7  | 0.0  | 32.1     | 0.0  | 27.7     | 38.5    | nd      | 0.0     | 1100   | a | <sup>17</sup> |
| TEGm250   | Hybrid                | 20.0 | 4.3 | 3.8  | 2.0  | 19.8     | 3.5  | 19.1     | 17.1    | nd      | 6.2     | 1600   | a | <sup>17</sup> |
| TEGm258   | Hybrid                | 50.4 | 6.4 | 4.7  | 1.8  | 9.1      | 1.3  | 10.2     | 1.9     | nd      | 2.3     | 1600   | a | <sup>17</sup> |
| TEGm288   | Hybrid                | 30.9 | 5.5 | 9.8  | 8.5  | 12.9     | 7.1  | 12.1     | 8.3     | nd      | 2.2     | 1300   | a | <sup>17</sup> |
| TEGm413   | Hybrid                | 14.8 | 6.6 | 13.6 | 7.6  | 14.2     | 5.9  | 14.7     | 16.9    | nd      | 3.9     | 1100   | a | <sup>17</sup> |
| TEGm419   | Hybrid                | 13.2 | 7.6 | 13.7 | 12.2 | 15.2     | 8.0  | 8.9      | 15.2    | nd      | 3.6     | 1400   | a | <sup>17</sup> |
| TEGm492   | Hybrid                | 2.5  | 1.5 | 8.6  | 0.0  | 21.9     | 2.8  | 25.7     | 24.0    | nd      | 12.5    | 600    | a | <sup>17</sup> |
| TEGm501   | Hybrid                | 0.4  | 0.4 | 9.1  | 1.0  | 38.7     | 4.9  | 17.1     | 23.7    | nd      | 4.6     | 870    | a | <sup>17</sup> |
| TEGm520   | Hybrid                | 2.4  | 3.1 | 8.8  | 10.3 | 24.0     | 15.0 | 11.4     | 20.6    | nd      | 2.8     | 1000   | a | <sup>17</sup> |
| TEGm546   | Hybrid                | 1.3  | 5.2 | 21.1 | 7.1  | 22.1     | 11.7 | 14.9     | 12.2    | nd      | 3.4     | 610    | a | <sup>17</sup> |
| UcFatB-M1 | <i>U. californica</i> | nd   | nd  | nd   | nd   | 29±3     | nd   | 24±3     | 32±2    | 10±1    | 5.3±0.8 | 140±10 | b | <sup>18</sup> |
| UcFatB-M2 | <i>U. californica</i> | nd   | nd  | nd   | nd   | 33±4     | nd   | 24±3     | 27±2    | 9.9±0.8 | 5.6±0.5 | 105±10 | b | <sup>18</sup> |
| UcFatB-M3 | <i>U. californica</i> | nd   | nd  | nd   | nd   | 33±1     | nd   | 32.7±0.6 | 21±1    | 8.4±0.4 | 5.8±0.4 | 111±4  | b | <sup>18</sup> |
| UcFatB-M4 | <i>U. californica</i> | nd   | nd  | nd   | nd   | 15.4±0.6 | nd   | 21±4     | 46±1    | 16±4    | 1.0±0.4 | 53±4   | b | <sup>18</sup> |
| UcFatB-M5 | <i>U. californica</i> | nd   | nd  | nd   | nd   | 11.1±0.9 | nd   | 42±6     | 6±2     | 41±4    | 0.4±0.4 | 24±2   | b | <sup>18</sup> |
| UcFatB-M6 | <i>U. californica</i> | nd   | nd  | nd   | nd   | 12.9±0.9 | nd   | 44±4     | 8.9±0.6 | 34±3    | 0.9±0.9 | 33±3   | b | <sup>18</sup> |
| UcFatB-M7 | <i>U. californica</i> | nd   | nd  | nd   | nd   | 12±2     | nd   | 45±6     | 10±1    | 30±4    | 2.6±0.5 | 38±4   | b | <sup>18</sup> |
| UcFatB-M8 | <i>U. californica</i> | nd   | nd  | nd   | nd   | 12±2     | nd   | 41±5     | 7±1     | 39±3    | 0.6±0.6 | 33±3   | b | <sup>18</sup> |

<sup>a</sup> Standard deviation not determined or provided; total FFA values with unknown standard deviation was reported to two significant figures

<sup>b</sup> Data approximated using image processing software

<sup>c</sup> Mole-based values not provided and incapable of being calculated; mass-based values used instead

<sup>d</sup> 16:0 and 16:1 fatty acid compositions combined

**Table S2. Sequences of all variants considered in this study.** Mutant names match the formatting provided for **Table S1**. “Changes” indicates the number of amino acid changes, or whether a frameshift or truncation occurred for the mutant. Amino acid substitutions are provided in the format *XyZ*, where *X* is the WT residue at position *y* and *Z* is the new amino acid. “stop” indicates a stop codon replaces the existing amino acid, resulting in a shorter peptide (a truncation). A frameshift indicates that a WT amino acid was eradicated and not replaced by a different residue.

| Name   | Changes | Mutations                                      |
|--------|---------|------------------------------------------------|
| R1.M1  | 1       | Y145K                                          |
| R1.M2  | 1       | L11G                                           |
| R1.M3  | 3       | L11G, I107K, R108K                             |
| R1.M4  | 4       | L11G, L76K, I107K, R108K                       |
| R1.M5  | 5       | L11G, L76K, I107K, R108K, F139E                |
| R1.M6  | 6       | L11G, L76K, I107K, R108K, F139E, Y145R         |
| R1.M7  | 6       | L11G, L76K, I107K, R108K, F139E, Y145K         |
| R1.M8  | 7       | L11G, L76K, I107K, R108K, A111E, F139E, Y145R  |
| R1.M9  | 5       | I107K, R108K, A111E, F139E, Y145R              |
| R1.M10 | 7       | L11G, L76K, I107K, R108K, A111E, F139E, Y145K  |
| R1.M11 | 5       | I107K, R108K, A111E, F139E, Y145K              |
| R1.M12 | 5       | I107K, R108K, A111E, F139H, Y145K              |
| R2.M1  | 3       | G72F, F139W, Y145F                             |
| R2.M2  | 7       | G72L, F139P, M141W, E142L, Y145F, G155A, I156L |
| R2.M3  | 5       | L11W, G72F, F139W, E142P, Y145F                |
| R2.M4  | 7       | G72L, F139P, M141W, E142P, Y145P, G155W, I156L |
| R2.M5  | 2       | E142P, Y145F                                   |
| R2.M6  | 4       | L11F, G72F, F139M, Y145F                       |
| R2.M7  | 4       | G72F, Y145F, G155W, I156L                      |
| R2.M8  | 7       | G72L, F139P, M141W, E142P, Y145P, G155A, I156L |
| R2.M9  | 5       | L11F, G72F, F139W, E142P, Y145F                |
| R2.M10 | 6       | G72L, F139P, M141W, E142P, G155A, I156L        |
| R2.M11 | 2       | L11P, Y145F                                    |
| R2.M12 | 4       | L11F, G72F, F139W, Y145F                       |
| R2.M13 | 2       | G72F, Y145F                                    |
| R2.M14 | 3       | G72A, E142P, Y145P                             |
| R2.RD1 | 1       | G72A                                           |
| R2.RD2 | 1       | G72L                                           |
| R2.RD3 | 1       | L11P                                           |
| R2.RD4 | 2       | L11P, G72F                                     |
| R2.RD5 | 1       | L11W                                           |
| R3.M1  | 3       | S122K, Y145K, L146K                            |



|        |   |                                          |
|--------|---|------------------------------------------|
| R3.M2  | 1 | M141L                                    |
| R3.M3  | 4 | I107L, R108K, Y145K, L146K               |
| R3.M4  | 3 | M141L, Y145K, L146K                      |
| R3.M5  | 5 | I107K, R108F, L109I, Y145K, L146K        |
| R3.M6  | 1 | R108K                                    |
| R3.M7  | 2 | Y145K, L146K                             |
| R3.M8  | 2 | S122K, Y145K                             |
| R3.M9  | 3 | S122L, Y145K, L146K                      |
| R3.M10 | 4 | S122K, M141K, Y145K, L146K               |
| R3.RD1 | 2 | I107L, R108K                             |
| R3.RD2 | 3 | I107K, R108F, L109I                      |
| R3.RD3 | 1 | S122K                                    |
| R3.RD4 | 1 | S122L                                    |
| R3.RD5 | 2 | E142P, Y145K                             |
| R4.M1  | 3 | I107M, R108F, E142P                      |
| R4.M2  | 3 | M141L, E142P, Y145F                      |
| R4.M3  | 2 | S122M, E142P                             |
| R4.M4  | 1 | E142P                                    |
| R4.M5  | 4 | S122M, M141L, E142P, Y145F               |
| R4.M6  | 2 | E142P, Y145F                             |
| R4.M7  | 1 | I107G                                    |
| R4.M8  | 1 | M141G                                    |
| R4.M9  | 1 | I107K                                    |
| R4.M10 | 3 | R108F, L109F, E142P                      |
| R4.M11 | 4 | R108F, L109F, S122I, E142P               |
| R4.M12 | 4 | R108F, L109F, M141G, Y145F               |
| R4.M13 | 5 | R108F, L109F, S122M, Y145F, L146P        |
| R4.M14 | 3 | R108F, Y145F, L146P                      |
| R4.M15 | 3 | R108F, L109F, Y145F                      |
| R4.M16 | 3 | R108K, L109I, L146K                      |
| R4.M17 | 3 | R108F, L109F, S122M                      |
| R4.M18 | 2 | R108F, L109F                             |
| R4.RD1 | 2 | M141L, E142P                             |
| R4.RD2 | 2 | M141L, Y145K                             |
| R4.RD3 | 4 | M141L, E142P, Y145K, L146K               |
| R4.RD4 | 3 | R108F, L109F, M141L                      |
| R4.RD5 | 6 | R108F, L109F, M141L, E142P, Y145K, L146K |
| R4.RD6 | 5 | R108F, L109F, M141L, Y145K, L146K        |
| R4.RD7 | 1 | H157A                                    |

|         |            |                                                                                |
|---------|------------|--------------------------------------------------------------------------------|
| R4.RD8  | 2          | I107M, R108F                                                                   |
| R4.RD9  | 1          | R108F                                                                          |
| R4.RD10 | 1          | S122I                                                                          |
| R4.RD11 | 1          | S122M                                                                          |
| RM.M1   | 2          | S36T, P110T                                                                    |
| RM.M2   | 1          | L146I                                                                          |
| RM.M3   | 2          | A19S, A98P                                                                     |
| RM.M4   | 3          | Q49H, M105K, D161N                                                             |
| RM.M5   | truncation | G8C, M105L, Y117stop                                                           |
| RM.M6   | 1          | P110S                                                                          |
| RM.M7   | 1          | L57P                                                                           |
| RM.M8   | 1          | A123T                                                                          |
| RM.M9   | 3          | G72V, D74N, F79Y                                                               |
| RM.M10  | 1          | Q93H                                                                           |
| RM.M11  | truncation | Q106stop                                                                       |
| RM.M12  | 1          | P158H                                                                          |
| RM.M13  | 2          | S41N, A162V                                                                    |
| RM.M14  | 1          | P148S                                                                          |
| RM.M15  | 2          | F121Y, P126L                                                                   |
| RM.M16  | 1          | R64H                                                                           |
| RM.M17  | 2          | P102A, A111V                                                                   |
| RM.M18  | 2          | F79Y, Q82H                                                                     |
| RM.M19  | 1          | L57Q                                                                           |
| RM.M20  | 2          | A22T, A129T                                                                    |
| RM.M21  | 1          | L136P                                                                          |
| RM.M22  | 3          | T3M, M17I, E69G                                                                |
| RM.M23  | truncation | W33stop                                                                        |
| RM.M24  | frameshift | Q90single nucleotide deletion                                                  |
| RM.M25  | 2          | G44C, A56T                                                                     |
| RM.M26  | frameshift | A25T, frameshift after K127                                                    |
| RM.M27  | 1          | S12I                                                                           |
| RM.M28  | 3          | W23C, V68L, G75S                                                               |
| RM.M29  | 3          | V38F, F139Y, Y145C                                                             |
| RM.M30  | 2          | A22V, A171V                                                                    |
| RM.M31  | 4          | L109P, Y117N, A123V, K147E                                                     |
| RM.M32  | 2          | N28K, A123V                                                                    |
| RM.M33  | frameshift | G8V frameshift resulting in stop codon at 10 <sup>th</sup> amino acid position |
| RM.M34  | 1          | P55L                                                                           |
| RM.M35  | 2          | S41G, L92M                                                                     |

|        |            |                                                                  |
|--------|------------|------------------------------------------------------------------|
| RM.M36 | 2          | S47P, M170I                                                      |
| RM.M37 | 1          | P135S                                                            |
| RM.M38 | 1          | A25P                                                             |
| RM.M39 | 2          | T35S, E142D                                                      |
| RM.M40 | 4          | L92S, V95I, E101D, W169L                                         |
| RM.M41 | 1          | L92S                                                             |
| RM.M42 | 5          | I42V, G75A, Q106R, A111G, P138S                                  |
| RM.M43 | 1          | L67M                                                             |
| RM.M44 | 1          | A120V                                                            |
| RM.M45 | truncation | E69stop                                                          |
| RM.M46 | truncation | E119stop                                                         |
| RM.M47 | 1          | S41N                                                             |
| RM.M48 | 1          | L58R                                                             |
| RM.M49 | truncation | A19T, W31stop                                                    |
| RM.M50 | 3          | M105K, R115C, P135del                                            |
| RM.M51 | truncation | truncation one nucleotide after A40 resulting also in frameshift |
| RM.M52 | 2          | M170I, A171V                                                     |
| RM.M53 | 1          | W150L                                                            |
| RM.M54 | 2          | A25T, S41I                                                       |
| RM.M55 | 2          | P135T, D161N                                                     |
| RM.M56 | 1          | <b>D2V</b>                                                       |
| RM.M57 | 2          | A111T, M141I                                                     |
| RM.M58 | 1          | G155D                                                            |
| RM.M59 | 1          | R108C                                                            |
| RM.M60 | 1          | T46I                                                             |
| RM.M61 | 1          | E101V                                                            |

**Table S3. Fatty acid production profiles for C<sub>12</sub>-specific random variants and their constituent point mutations.** This table provides the mole fractions of C<sub>8</sub>-C<sub>18</sub> FFAs and total FFA in the cell lysate for RM.M39 and RM.M57 (the two C<sub>12</sub>-specific RM variants) as well as the individual amino acid substitutions (see **Table S2**).

| Name   | Fatty Acid Composition (mol %) |           |      |         |      |         |          |          |           |         | Total FFA (μM) |
|--------|--------------------------------|-----------|------|---------|------|---------|----------|----------|-----------|---------|----------------|
|        | 8:0                            | 10:0      | 12:0 | 12:1    | 14:0 | 14:1    | 16:0     | 16:1     | 18:0      | 18:1    |                |
| WT     | 5.9±0.3                        | 1.09±0.06 | 20±1 | 7.5±0.5 | 29±2 | 7.1±0.4 | 14.2±0.8 | 11.6±0.8 | 0.22±0.01 | 2.1±0.1 | 1900±50        |
| T35S   | 2.7±0.9                        | 0.9±0.1   | 16±4 | 6±2     | 28±7 | 6±2     | 21±7     | 17±2     | 0.3±0.1   | 2.3±0.4 | 1600±200       |
| E142D  | 5.5±0.7                        | 2.5±0.2   | 33±3 | 12±1    | 26±2 | 6.1±0.6 | 5.7±0.8  | 8.1±0.8  | 0.14±0.04 | 1.2±0.1 | 3000±100       |
| RM.M39 | 6±2                            | 2.5±0.4   | 32±6 | 12±2    | 26±6 | 6±1     | 6.4±0.6  | 8±2      | 0.10±0.01 | 1.2±0.3 | 2800±200       |
| A111T  | 4±2                            | 1.0±0.1   | 15±3 | 6±1     | 25±5 | 6±1     | 23±3     | 17±3     | 0.35±0.06 | 2.2±0.4 | 1140±80        |
| M141I  | 4±2                            | 2.5±0.3   | 17±4 | 14±3    | 21±4 | 3.8±0.9 | 20±2     | 14±2     | 0.32±0.04 | 2.2±0.3 | 1200±80        |
| RM.M57 | 5±1                            | 2.9±0.7   | 17±4 | 14±4    | 21±4 | 3.8±1.0 | 20±2     | 13±1     | 0.33±0.05 | 2.1±0.3 | 1400±100       |

**Table S4. ‘TesA residues sorted by distance from acyl-ACP for design position selection.** Design positions were selected from each round using the eight closest residues that were not excluded from consideration. The method used to sort by distance varied between R1-R2 and R3-R4. The sorted list is provided in the table. Residues are labeled by their WT amino acid followed by the position of the residue. Residues that were excluded from design position consideration were annotated. The distance used to sort the residues is provided within parentheses. Thus, the eight highest ranked residues that were not annotated (i.e., excluded) formed the set of design positions employed within IPRO.

| <b>Rank</b> | <b>R1<sup>a</sup></b>         | <b>R2<sup>a</sup></b>         | <b>R3-R4<sup>b</sup></b>     |
|-------------|-------------------------------|-------------------------------|------------------------------|
| 1           | Y145 (1.83 Å)                 | Y145 (1.83 Å)                 | P110 <sup>k</sup> (1.83 Å)   |
| 2           | L109 <sup>f,h</sup> (2.70 Å)  | L109 <sup>f</sup> (2.70 Å)    | Y145 (2.70 Å)                |
| 3           | P110 <sup>c</sup> (2.77 Å)    | P110 <sup>c</sup> (2.77 Å)    | R108 (2.77 Å)                |
| 4           | R108 (3.02 Å)                 | R108 <sup>i</sup> (3.02 Å)    | M141 (3.02 Å)                |
| 5           | N73 <sup>d,g,h</sup> (3.08 Å) | N73 <sup>d,g</sup> (3.08 Å)   | A111 <sup>l</sup> (3.08 Å)   |
| 6           | S10 <sup>c,d,g</sup> (3.25 Å) | S10 <sup>c,d,g</sup> (3.25 Å) | L109 (3.25 Å)                |
| 7           | G44 <sup>d,g,h</sup> (3.33 Å) | G44 <sup>d,g</sup> (3.33 Å)   | I156 <sup>k</sup> (3.33 Å)   |
| 8           | D9 <sup>g</sup> (3.47 Å)      | D9 <sup>g</sup> (3.47 Å)      | E142 (3.47 Å)                |
| 9           | L11 (3.71 Å)                  | L11 (3.71 Å)                  | G155 <sup>k</sup> (3.71 Å)   |
| 10          | A111 (3.72 Å)                 | A111 <sup>j</sup> (3.72 Å)    | F139 <sup>k</sup> (3.72 Å)   |
| 11          | G72 (3.81 Å)                  | G72 (3.81 Å)                  | N112 <sup>k,l</sup> (3.81 Å) |
| 12          | L76 (3.86 Å)                  | L76 <sup>j</sup> (3.86 Å)     | Y113 <sup>k,l</sup> (3.86 Å) |
| 13          | H157 <sup>c,h</sup> (3.99 Å)  | H157 <sup>c</sup> (3.99 Å)    | V144 <sup>k</sup> (3.99 Å)   |
| 14          | I156 <sup>h</sup> (4.21 Å)    | I156 (4.21 Å)                 | N118 <sup>l</sup> (4.21 Å)   |
| 15          | F139 (4.37 Å)                 | F139 (4.37 Å)                 | I107 (4.37 Å)                |
| 16          | S43 <sup>g</sup> (4.37 Å)     | S43 <sup>g</sup> (4.37 Å)     | M151 <sup>k,l</sup> (4.37 Å) |
| 17          | D45 <sup>g</sup> (4.82 Å)     | D45 <sup>g</sup> (4.82 Å)     | L76 <sup>k</sup> (4.82 Å)    |
| 18          | I107 (4.83 Å)                 | I107 <sup>i</sup> (4.83 Å)    | G72 <sup>k</sup> (4.83 Å)    |
| 19          | G155 (5.01 Å)                 | G155 (5.01 Å)                 | L146 (5.01 Å)                |
| 20          | I42 <sup>g,h</sup> (5.14 Å)   | I42 <sup>g</sup> (5.14 Å)     | H157 <sup>k</sup> (5.14 Å)   |
| 21          | E142 <sup>h</sup> (5.53 Å)    | E142 (5.53 Å)                 | S122 (5.53 Å)                |
| 22          | M141 (5.56 Å)                 | M141 (5.56 Å)                 | D154 <sup>k</sup> (5.56 Å)   |
| 23          | E69 (5.62 Å)                  | E69 (5.62 Å)                  | P158 <sup>k</sup> (5.62 Å)   |
| 24          | Y15 (5.96 Å)                  | Y15 (5.96 Å)                  | L11 <sup>k</sup> (5.96 Å)    |
| 25          | N112 (5.98 Å)                 | N112 <sup>j</sup> (5.98 Å)    | E143 (5.98 Å)                |
| 26          | G71 (6.15 Å)                  | G71 (6.15 Å)                  | F121 <sup>k</sup> (6.15 Å)   |
| 27          | M151 (6.22 Å)                 | M151 (6.22 Å)                 | G75 <sup>k</sup> (6.22 Å)    |
| 28          | N118 (6.23 Å)                 | N118 <sup>j</sup> (6.23 Å)    | F140 <sup>k</sup> (6.23 Å)   |
| 29          | S12 (6.43 Å)                  | S12 (6.43 Å)                  | G114 <sup>k,l</sup> (6.43 Å) |
| 30          | F121 (6.66 Å)                 | F121 (6.66 Å)                 | Q106 (6.66 Å)                |
| 31          | Y113 (6.67 Å)                 | Y113 <sup>j</sup> (6.67 Å)    | P148 <sup>l</sup> (6.67 Å)   |

|    |                             |                             |                              |
|----|-----------------------------|-----------------------------|------------------------------|
| 32 | G75 (6.97 Å)                | G75 <sup>j</sup> (6.97 Å)   | Q152 <sup>k,l</sup> (6.97 Å) |
| 33 | G8 (6.99 Å)                 | G8 (6.99 Å)                 | W150 <sup>l</sup> (6.99 Å)   |
| 34 | P158 <sup>c</sup> (7.02 Å)  | P158 <sup>c</sup> (7.02 Å)  | K147 <sup>l</sup> (7.02 Å)   |
| 35 | D74 (7.06 Å)                | D74 (7.06 Å)                | Y117 <sup>k,l</sup> (7.06 Å) |
| 36 | T46 <sup>h</sup> (7.12 Å)   | T46 (7.12 Å)                | P138 <sup>k</sup> (7.12 Å)   |
| 37 | G14 <sup>h</sup> (7.56 Å)   | G14 (7.56 Å)                | G71 <sup>k</sup> (7.56 Å)    |
| 38 | A13 (7.56 Å)                | A13 (7.56 Å)                | R115 <sup>l</sup> (7.56 Å)   |
| 39 | L70 <sup>h</sup> (7.67 Å)   | L70 (7.67 Å)                | N73 <sup>k</sup> (7.67 Å)    |
| 40 | D154 <sup>c</sup> (7.87 Å)  | D154 <sup>c</sup> (7.87 Å)  | A162 <sup>k</sup> (7.87 Å)   |
| 41 | S122 (8.22 Å)               | S122 (8.22 Å)               | S10 <sup>k</sup> (8.22 Å)    |
| 42 | R77 <sup>h</sup> (8.22 Å)   | R77 <sup>j</sup> (8.22 Å)   | M105 (8.22 Å)                |
| 43 | V144 (8.32 Å)               | V144 (8.32 Å)               | E119 <sup>l</sup> (8.32 Å)   |
| 44 | Q49 (8.38 Å)                | Q49 (8.38 Å)                | Y15 <sup>k</sup> (8.38 Å)    |
| 45 | Q106 (8.41 Å)               | Q106 (8.41 Å)               | Y125 <sup>k</sup> (8.41 Å)   |
| 46 | F140 <sup>h</sup> (8.41 Å)  | F140 (8.41 Å)               | D9 <sup>k</sup> (8.41 Å)     |
| 47 | S41 (8.51 Å)                | S41 (8.51 Å)                | D153 <sup>l</sup> (8.51 Å)   |
| 48 | Y125 (8.55 Å)               | Y125 (8.55 Å)               | E69 <sup>k</sup> (8.55 Å)    |
| 49 | L146 <sup>h</sup> (8.61 Å)  | L146 (8.61 Å)               | G78 <sup>k</sup> (8.61 Å)    |
| 50 | E143 <sup>h</sup> (8.76 Å)  | E143 (8.76 Å)               | D74 <sup>k</sup> (8.76 Å)    |
| 51 | M105 (9.31 Å)               | M105 (9.31 Å)               | I166 <sup>k</sup> (9.31 Å)   |
| 52 | S47 (9.35 Å)                | S47 (9.35 Å)                | N159 <sup>k</sup> (9.35 Å)   |
| 53 | R16 (9.41 Å)                | R16 (9.41 Å)                | R77 <sup>k</sup> (9.41 Å)    |
| 54 | G114 <sup>h</sup> (9.51 Å)  | G114 <sup>j</sup> (9.51 Å)  | I124 (9.51 Å)                |
| 55 | Q152 (9.75 Å)               | Q152 (9.75 Å)               | A120 (9.75 Å)                |
| 56 | Y117 (9.76 Å)               | Y117 <sup>j</sup> (9.76 Å)  | Q149 <sup>l</sup> (9.76 Å)   |
| 57 | R53 (9.87 Å)                | R53 (9.87 Å)                | A123 (9.87 Å)                |
| 58 | W23 (10.13 Å)               | W23 (10.13 Å)               | L70 <sup>k</sup> (10.13 Å)   |
| 59 | G78 (10.15 Å)               | G78 <sup>j</sup> (10.15 Å)  | L137 (10.15 Å)               |
| 60 | E119 <sup>h</sup> (10.41 Å) | E119 <sup>j</sup> (10.41 Å) | S12 <sup>k</sup> (10.41 Å)   |
| 61 | L7 <sup>h</sup> (10.46 Å)   | L7 (10.46 Å)                | P81 <sup>k</sup> (10.46 Å)   |
| 62 | K147 <sup>h</sup> (10.68 Å) | K147 (10.68 Å)              | R116 <sup>l</sup> (10.68 Å)  |
| 63 | R115 <sup>h</sup> (10.78 Å) | R115 <sup>j</sup> (10.78 Å) | G44 <sup>k</sup> (10.78 Å)   |
| 64 | G50 (10.89 Å)               | G50 (10.89 Å)               | W169 (10.89 Å)               |
| 65 | T84 (11.10 Å)               | T84 (11.10 Å)               | G14 <sup>k</sup> (11.10 Å)   |
| 66 | M17 (11.11 Å)               | M17 (11.11 Å)               | T84 (11.11 Å)                |
| 67 | A40 <sup>h</sup> (11.16 Å)  | A40 (11.16 Å)               | F165 (11.16 Å)               |
| 68 | Q163 (11.17 Å)              | Q163 (11.17 Å)              | F79 (11.17 Å)                |
| 69 | W150 (11.31 Å)              | W150 (11.31 Å)              | G8 <sup>k</sup> (11.31 Å)    |
| 70 | I166 (11.32 Å)              | I166 (11.32 Å)              | S43 <sup>k</sup> (11.32 Å)   |

|     |                             |                             |                             |
|-----|-----------------------------|-----------------------------|-----------------------------|
| 71  | D153 <sup>h</sup> (11.33 Å) | D153 (11.33 Å)              | P126 (11.33 Å)              |
| 72  | N39 (11.41 Å)               | N39 (11.41 Å)               | W23 <sup>k</sup> (11.41 Å)  |
| 73  | N159 (11.42 Å)              | N159 (11.42 Å)              | L136 <sup>k</sup> (11.42 Å) |
| 74  | F79 (11.44 Å)               | F79 <sup>j</sup> (11.44 Å)  | S47 (11.44 Å)               |
| 75  | A22 (11.51 Å)               | A22 (11.51 Å)               | Q163 <sup>k</sup> (11.51 Å) |
| 76  | V68 (11.54 Å)               | V68 (11.54 Å)               | T46 <sup>k</sup> (11.54 Å)  |
| 77  | P148 <sup>e</sup> (11.59 Å) | P148 <sup>e</sup> (11.59 Å) | R16 <sup>l</sup> (11.59 Å)  |
| 78  | P138 <sup>e</sup> (11.67 Å) | P138 <sup>e</sup> (11.67 Å) | M170 (11.67 Å)              |
| 79  | Q48 (11.69 Å)               | Q48 (11.69 Å)               | D161 (11.69 Å)              |
| 80  | I6 (11.72 Å)                | I6 (11.72 Å)                | L104 <sup>k</sup> (11.72 Å) |
| 81  | L88 (12.02 Å)               | L88 (12.02 Å)               | A13 <sup>k</sup> (12.02 Å)  |
| 82  | P24 <sup>e</sup> (12.16 Å)  | P24 <sup>e</sup> (12.16 Å)  | D45 <sup>k</sup> (12.16 Å)  |
| 83  | I124 (12.31 Å)              | I124 (12.31 Å)              | Q173 (12.31 Å)              |
| 84  | R116 <sup>h</sup> (12.66 Å) | R116 <sup>i</sup> (12.66 Å) | S41 <sup>k</sup> (12.66 Å)  |
| 85  | A123 <sup>h</sup> (12.68 Å) | A123 (12.68 Å)              | A22 (12.68 Å)               |
| 86  | A120 (12.69 Å)              | A120 <sup>j</sup> (12.69 Å) | V68 (12.69 Å)               |
| 87  | L137 (13.07 Å)              | L137 (13.07 Å)              | L88 <sup>k</sup> (13.07 Å)  |
| 88  | L67 (13.19 Å)               | L67 (13.19 Å)               | R160 (13.19 Å)              |
| 89  | L51 (13.27 Å)               | L51 (13.27 Å)               | M17 <sup>l</sup> (13.27 Å)  |
| 90  | A162 (13.28 Å)              | A162 (13.28 Å)              | E85 (13.28 Å)               |
| 91  | L104 (13.37 Å)              | L104 (13.37 Å)              | L67 (13.37 Å)               |
| 92  | S18 <sup>h</sup> (13.41 Å)  | S18 (13.41 Å)               | A129 <sup>k</sup> (13.41 Å) |
| 93  | W169 (13.43 Å)              | W169 (13.43 Å)              | K127 (13.43 Å)              |
| 94  | P81 <sup>e</sup> (13.54 Å)  | P81 <sup>e</sup> (13.54 Å)  | Q80 (13.54 Å)               |
| 95  | A19 (13.56 Å)               | A19 (13.56 Å)               | A167 <sup>k</sup> (13.56 Å) |
| 96  | Q149 <sup>h</sup> (13.56 Å) | Q149 (13.56 Å)              | L128 <sup>k</sup> (13.56 Å) |
| 97  | M170 (13.69 Å)              | M170 (13.69 Å)              | P24 <sup>k</sup> (13.69 Å)  |
| 98  | I91 (13.76 Å)               | I91 (13.76 Å)               | I6 (13.76 Å)                |
| 99  | R160 <sup>h</sup> (13.90 Å) | R160 (13.90 Å)              | I42 (13.90 Å)               |
| 100 | L136 (14.23 Å)              | L136 (14.23 Å)              | D168 (14.23 Å)              |
| 101 | Q80 <sup>h</sup> (14.28 Å)  | Q80 <sup>j</sup> (14.28 Å)  | P164 (14.28 Å)              |
| 102 | P126 <sup>e</sup> (14.42 Å) | P126 <sup>e</sup> (14.42 Å) | L7 <sup>k</sup> (14.42 Å)   |
| 103 | A21 (14.45 Å)               | A21 (14.45 Å)               | L103 <sup>k</sup> (14.45 Å) |
| 104 | T87 (14.46 Å)               | T87 (14.46 Å)               | Q83 (14.46 Å)               |
| 105 | E85 (14.64 Å)               | E85 (14.64 Å)               | T87 (14.64 Å)               |
| 106 | A52 (15.04 Å)               | A52 (15.04 Å)               | K172 (15.04 Å)              |
| 107 | L103 (15.26 Å)              | L103 (15.26 Å)              | G50 <sup>k</sup> (15.26 Å)  |
| 108 | L57 (15.37 Å)               | L57 (15.37 Å)               | Q49 (15.37 Å)               |
| 109 | Q83 (15.58 Å)               | Q83 (15.58 Å)               | Q82 (15.58 Å)               |

|     |                               |                             |                             |
|-----|-------------------------------|-----------------------------|-----------------------------|
| 110 | L128 (15.59 Å)                | L128 (15.59 Å)              | A21 (15.59 Å)               |
| 111 | A25 (15.64 Å)                 | A25 (15.64 Å)               | P135 (15.64 Å)              |
| 112 | V38 <sup>h</sup> (15.71 Å)    | V38 (15.71 Å)               | L174 <sup>k</sup> (15.71 Å) |
| 113 | S20 <sup>h</sup> (15.81 Å)    | S20 (15.81 Å)               | Q48 (15.81 Å)               |
| 114 | L5 (16.02 Å)                  | L5 (16.02 Å)                | L27 <sup>k</sup> (16.02 Å)  |
| 115 | A167 <sup>h</sup> (16.03 Å)   | A167 (16.03 Å)              | N39 <sup>k</sup> (16.03 Å)  |
| 116 | Q82 <sup>h</sup> (16.04 Å)    | Q82 (16.04 Å)               | L26 <sup>k</sup> (16.04 Å)  |
| 117 | L54 (16.11 Å)                 | L54 (16.11 Å)               | I91 <sup>k</sup> (16.11 Å)  |
| 118 | D161 (16.25 Å)                | D161 (16.25 Å)              | A171 (16.25 Å)              |
| 119 | V66 (16.52 Å)                 | V66 (16.52 Å)               | V134 <sup>l</sup> (16.52 Å) |
| 120 | F165 (16.57 Å)                | F165 (16.57 Å)              | K130 (16.57 Å)              |
| 121 | L92 (16.80 Å)                 | L92 (16.80 Å)               | A19 <sup>l</sup> (16.80 Å)  |
| 122 | P164 <sup>e,h</sup> (16.88 Å) | P164 <sup>e</sup> (16.88 Å) | Q86 (16.88 Å)               |
| 123 | Q173 (17.03 Å)                | Q173 (17.03 Å)              | L51 <sup>k</sup> (17.03 Å)  |
| 124 | V37 (17.04 Å)                 | V37 (17.04 Å)               | A25 <sup>k</sup> (17.04 Å)  |
| 125 | Q86 <sup>h</sup> (17.06 Å)    | Q86 (17.06 Å)               | L92 (17.06 Å)               |
| 126 | R89 (17.23 Å)                 | R89 (17.23 Å)               | A40 <sup>k</sup> (17.23 Å)  |
| 127 | L26 (17.38 Å)                 | L26 (17.38 Å)               | P102 (17.38 Å)              |
| 128 | P135 <sup>e</sup> (17.51 Å)   | P135 <sup>e</sup> (17.51 Å) | R89 (17.51 Å)               |
| 129 | K127 (17.53 Å)                | K127 (17.53 Å)              | V66 <sup>k</sup> (17.53 Å)  |
| 130 | L27 (17.66 Å)                 | L27 (17.66 Å)               | L177 (17.66 Å)              |
| 131 | L174 (17.80 Å)                | L174 (17.80 Å)              | S18 <sup>l</sup> (17.80 Å)  |
| 132 | L4 (18.13 Å)                  | L4 (18.13 Å)                | E131 (18.13 Å)              |
| 133 | A129 (18.20 Å)                | A129 (18.20 Å)              | V37 <sup>k</sup> (18.20 Å)  |
| 134 | D168 (18.62 Å)                | D168 (18.62 Å)              | F132 <sup>l</sup> (18.62 Å) |
| 135 | P55 <sup>e</sup> (18.88 Å)    | P55 <sup>e</sup> (18.88 Å)  | L4 (18.88 Å)                |
| 136 | A171 <sup>h</sup> (18.95 Å)   | A171 (18.95 Å)              | R53 <sup>k</sup> (18.95 Å)  |
| 137 | V95 (19.03 Å)                 | V95 (19.03 Å)               | L5 <sup>k</sup> (19.03 Å)   |
| 138 | P102 <sup>e</sup> (19.14 Å)   | P102 <sup>e</sup> (19.14 Å) | Q175 (19.14 Å)              |
| 139 | Q90 (19.20 Å)                 | Q90 (19.20 Å)               | L54 <sup>k</sup> (19.20 Å)  |
| 140 | V134 (19.34 Å)                | V134 (19.34 Å)              | P176 (19.34 Å)              |
| 141 | N28 (19.46 Å)                 | N28 (19.46 Å)               | Q90 (19.46 Å)               |
| 142 | H61 (19.60 Å)                 | H61 (19.60 Å)               | S20 <sup>l</sup> (19.60 Å)  |
| 143 | W65 (19.67 Å)                 | W65 (19.67 Å)               | W65 (19.67 Å)               |
| 144 | L177 (20.06 Å)                | L177 (20.06 Å)              | A52 (20.06 Å)               |
| 145 | Q60 (20.07 Å)                 | Q60 (20.07 Å)               | V95 (20.07 Å)               |
| 146 | D94 (20.41 Å)                 | D94 (20.41 Å)               | N28 (20.41 Å)               |
| 147 | A56 (20.42 Å)                 | A56 (20.42 Å)               | K30 <sup>l</sup> (20.42 Å)  |
| 148 | L58 (20.50 Å)                 | L58 (20.50 Å)               | V38 (20.50 Å)               |



|     |                             |                             |                              |
|-----|-----------------------------|-----------------------------|------------------------------|
| 149 | K172 (20.68 Å)              | K172 (20.68 Å)              | V178 (20.68 Å)               |
| 150 | K130 (20.74 Å)              | K130 (20.74 Å)              | D133 <sup>l</sup> (20.74 Å)  |
| 151 | E101 (20.91 Å)              | E101 (20.91 Å)              | D29 <sup>l</sup> (20.91 Å)   |
| 152 | W31 (20.95 Å)               | W31 <sup>j</sup> (20.95 Å)  | E101 (20.95 Å)               |
| 153 | F132 (21.00 Å)              | F132 (21.00 Å)              | L57 (21.00 Å)                |
| 154 | S36 <sup>h</sup> (21.31 Å)  | S36 (21.31 Å)               | W31 <sup>l</sup> (21.31 Å)   |
| 155 | Q93 (21.32 Å)               | Q93 (21.32 Å)               | D94 (21.32 Å)                |
| 156 | P63 <sup>e</sup> (21.42 Å)  | P63 <sup>e</sup> (21.42 Å)  | Q93 (21.42 Å)                |
| 157 | D29 (21.54 Å)               | D29 (21.54 Å)               | P63 <sup>k</sup> (21.54 Å)   |
| 158 | T3 (21.67 Å)                | T3 (21.67 Å)                | A100 <sup>k</sup> (21.67 Å)  |
| 159 | E131 (21.97 Å)              | E131 (21.97 Å)              | T35 (21.97 Å)                |
| 160 | K30 (22.18 Å)               | K30 (22.18 Å)               | K96 (22.18 Å)                |
| 161 | Q175 (22.37 Å)              | Q175 (22.37 Å)              | H180 (22.37 Å)               |
| 162 | V178 (22.79 Å)              | V178 (22.79 Å)              | T3 (22.79 Å)                 |
| 163 | A100 (23.19 Å)              | A100 (23.19 Å)              | L58 <sup>k</sup> (23.19 Å)   |
| 164 | K59 (23.20 Å)               | K59 (23.20 Å)               | H61 <sup>k,l</sup> (23.20 Å) |
| 165 | D133 <sup>h</sup> (23.23 Å) | D133 (23.23 Å)              | S36 (23.23 Å)                |
| 166 | K96 (23.32 Å)               | K96 (23.32 Å)               | R64 (23.32 Å)                |
| 167 | R64 (23.54 Å)               | R64 (23.54 Å)               | P55 <sup>k</sup> (23.54 Å)   |
| 168 | P176 <sup>e</sup> (23.57 Å) | P176 <sup>e</sup> (23.57 Å) | A98 <sup>l</sup> (23.57 Å)   |
| 169 | T35 (23.61 Å)               | T35 <sup>j</sup> (23.61 Å)  | A56 (23.61 Å)                |
| 170 | Q62 <sup>h</sup> (24.10 Å)  | Q62 (24.10 Å)               | K34 <sup>l</sup> (24.10 Å)   |
| 171 | A98 (24.21 Å)               | A98 (24.21 Å)               | Q32 <sup>l</sup> (24.21 Å)   |
| 172 | D2 (24.93 Å)                | D2 (24.93 Å)                | D2 (24.93 Å)                 |
| 173 | H180 (25.52 Å)              | H180 (25.52 Å)              | A97 (25.52 Å)                |
| 174 | A97 (25.70 Å)               | A97 (25.70 Å)               | Q60 <sup>l</sup> (25.70 Å)   |
| 175 | Q32 (25.71 Å)               | Q32 <sup>j</sup> (25.71 Å)  | K59 (25.71 Å)                |
| 176 | N99 <sup>h</sup> (26.55 Å)  | N99 (26.55 Å)               | N99 (26.55 Å)                |
| 177 | K34 (27.24 Å)               | K34 <sup>j</sup> (27.24 Å)  | Q62 (27.24 Å)                |
| 178 | A1 (27.76 Å)                | A1 (27.76 Å)                | A1 (27.76 Å)                 |
| 179 | S33 <sup>h</sup> (28.10 Å)  | S33 <sup>j</sup> (28.10 Å)  | S33 <sup>l</sup> (28.10 Å)   |

<sup>a</sup> Distance was calculated by finding the closest contact between the residue's heavy atoms and the acyl moiety carbon atoms of 'TesA:tetradecanoyl-ACP

<sup>b</sup> Distance was calculated between the residue's C $\beta$  atom (C $\alpha$  for glycine, C $\gamma$  for H180) and the  $\omega$ -1 atom of dodecanoyl-ACP

<sup>c</sup> Residue excluded because it is part of the 'TesA catalytic triad<sup>19</sup>

<sup>d</sup> Residue excluded because they form the 'TesA oxyanion hole<sup>19</sup>

<sup>e</sup> Residue excluded because legacy version of IPRO could not handle mutations from proline<sup>20</sup>

<sup>f</sup> Residue excluded because it was considered important for 'TesA function based on mutagenesis studies<sup>21</sup>

<sup>g</sup> Residue excluded because it was within 4.5 Å of the thioester sulfur atom

<sup>h</sup> Residue excluded because the C $\alpha$  atom was over 0.75 Å closer to the  $\omega$ -1 atom than the C $\beta$  atom (glycines not considered)

<sup>i</sup> Residue excluded based on R1 results that abolished 'TesA activity

<sup>j</sup> Residue excluded because it belongs to one of the three 'TesA flexible loops<sup>21</sup>

<sup>k</sup> Residue excluded because it has  $\geq 40\%$  sequence conservation in lysophospholipase L1-like subgroup alignment<sup>22</sup>

<sup>l</sup> Residue excluded because sequence alignment included at least one gap

**Table S5. Crystallography data collection statistics.** The data collection statistics for four structures (WT and R3.M4 under three different conditions) are provided.

|                                          | <b>WT</b>                           | <b>R3.M4<br/>(pH 5.0)</b>        | <b>R3.M4<br/>(pH 7.5)</b>           | <b>R3.M4<br/>(pH 7.5 “soaked”)</b>  |
|------------------------------------------|-------------------------------------|----------------------------------|-------------------------------------|-------------------------------------|
| Resolution limits (Å)                    | 50-1.65<br>(1.75-1.65) <sup>b</sup> | 50-1.2<br>(1.3-1.2) <sup>b</sup> | 50-1.15<br>(1.25-1.15) <sup>b</sup> | 50-0.97<br>(1.07-0.97) <sup>b</sup> |
| Space Group                              | <i>P2</i> <sub>1</sub>              | <i>P2</i> <sub>1</sub>           | <i>P2</i> <sub>1</sub>              | <i>P2</i> <sub>1</sub>              |
| <b>Unit cell</b>                         |                                     |                                  |                                     |                                     |
| <i>a</i> (Å)                             | 40.9                                | 40.7                             | 40.6                                | 40.5                                |
| <i>b</i> (Å)                             | 82.1                                | 55.2                             | 55.3                                | 55.0                                |
| <i>c</i> (Å)                             | 53.9                                | 42.3                             | 42.2                                | 42.0                                |
| β (°)                                    | 90.4                                | 105.2                            | 104.9                               | 104.9                               |
| no. of independent reflections           | 42019<br>(6561)                     | 56148<br>(11626)                 | 62723<br>(12626)                    | 102836<br>(24792)                   |
| completeness (%)                         | 98.0 (94.9)                         | 99.4 (97.3)                      | 98.2 (91.8)                         | 97.8 (92.8)                         |
| redundancy                               | 3.7 (2.6)                           | 3.7 (2.2)                        | 2.3 (1.3)                           | 4.1 (2.3)                           |
| avg <i>I</i> /avg σ( <i>I</i> )          | 10.6 (1.9)                          | 13.2 (3.0)                       | 11.0 (2.7)                          | 11.8 (2.4)                          |
| <i>R</i> <sub>sym</sub> (%) <sup>a</sup> | 6.8 (37.8)                          | 5.6 (30.2)                       | 4.5 (21.0)                          | 6.0 (27.8)                          |

$$^a R_{\text{sym}} = \left( \frac{\sum |\sum I - \bar{I}|}{\sum I} \right) \times 100$$

<sup>b</sup> Statistics for the highest resolution bin

**Table S6. Crystallography refinement statistics.** The refinement statistics for the crystallography experiments summarized in **Table S5** are provided.

|                                                           | <b>WT</b>  | <b>R3.M4<br/>(pH 5.0)</b> | <b>R3.M4<br/>(pH 7.5)</b> | <b>R3.M4<br/>(pH 7.5<br/>“soaked”)</b> |
|-----------------------------------------------------------|------------|---------------------------|---------------------------|----------------------------------------|
| PDB code                                                  | 5TIC       | 5TID                      | 5TIE                      | 5TIF                                   |
| resolution limits (Å)                                     | 50-1.65    | 50-1.2                    | 50-1.15                   | 50-0.97                                |
| <i>R</i> -factor <sup>a</sup> (overall)%/ no. reflections | 18.8/42019 | 15.9/56148                | 13.1/62723                | 12.3/102836                            |
| <i>R</i> -factor <sup>a</sup> (working)%/ no. reflections | 18.6/39926 | 15.8/53269                | 12.9/59641                | 12.2/97699                             |
| <i>R</i> -factor <sup>a</sup> (free)%/ no. reflections    | 22.2/2093  | 17.7/2879                 | 16.3/3082                 | 13.7/5137                              |
| no. of protein atoms                                      | 2839       | 1448                      | 1471                      | 1542                                   |
| no. of heteroatoms                                        | 347        | 344                       | 391                       | 449                                    |
| <b>average B values</b>                                   |            |                           |                           |                                        |
| protein (Å <sup>2</sup> )                                 | 20.1       | 10.4                      | 10.7                      | 13.7                                   |
| ligand (Å <sup>2</sup> )                                  | -          | 21.5                      | 20.6                      | 27.6                                   |
| solvent (Å <sup>2</sup> )                                 | 28.1       | 22.2                      | 24.1                      | 32.7                                   |
| <b>weighted RMSDs from ideality</b>                       |            |                           |                           |                                        |
| bond lengths (Å)                                          | 0.012      | 0.012                     | 0.017                     | 0.015                                  |
| bond angles (°)                                           | 1.77       | 1.74                      | 1.91                      | 2.01                                   |
| planar groups (Å)                                         | 0.008      | 0.009                     | 0.010                     | 0.010                                  |
| <b>Ramachandran regions (%)<sup>b</sup></b>               |            |                           |                           |                                        |
| most favored                                              | 97.7       | 97.2                      | 97.2                      | 97.8                                   |
| additionally allowed                                      | 2.3        | 2.8                       | 2.8                       | 2.2                                    |
| generously allowed                                        | 0.0        | 0.0                       | 0.0                       | 0.0                                    |

$$^a R\text{-factor} = \left( \frac{\sum |F_o - F_c|}{\sum |F_o|} \right) \times 100$$

<sup>b</sup> Distribution of Ramachandran angles according to PROCHECK<sup>23</sup>

## References

- (1) Grisewood, M. J.; Gifford, N. P.; Pantazes, R. J.; Li, Y.; Cirino, P. C.; Janik, M. J.; Maranas, C. D. *PLoS One* **2013**, *8*, e75358.
- (2) Jing, F. Y.; Cantu, D. C.; Tvaruzkova, J.; Chipman, J. P.; Nikolau, B. J.; Yandean-Nelson, M. D.; Reilly, P. J. *BMC Biochem.* **2011**, *12*.
- (3) Dormann, P.; Voelker, T. A.; Ohlrogge, J. B. *Arch. Biochem. Biophys.* **1995**, *316*, 612-618.
- (4) Ghosh, S. K.; Bhattacharjee, A.; Jha, J. K.; Mondal, A. K.; Maiti, M. K.; Basu, A.; Ghosh, D.; Ghosh, S.; Sen, S. K. *Plant Physiol. Biochem.* **2007**, *45*, 887-897.
- (5) Jha, J. K.; Maiti, M. K.; Bhattacharjee, A.; Basu, A.; Sen, P. C.; Sen, S. K. *Plant Physiol. Biochem.* **2006**, *44*, 645-655.
- (6) Dong, S. B.; Huang, J. C.; Li, Y. N.; Zhang, J.; Lin, S. Z.; Zhang, Z. X. *Gene* **2014**, *542*, 16-22.
- (7) Steen, E. J.; Kang, Y. S.; Bokinsky, G.; Hu, Z. H.; Schirmer, A.; McClure, A.; del Cardayre, S. B.; Keasling, J. D. *Nature* **2010**, *463*, 559-562.
- (8) Lu, X.; Vora, H.; Khosla, C. *Metab. Eng.* **2008**, *10*, 333-339.
- (9) Voelker, T. A.; Davies, H. M. *J. Bacteriol.* **1994**, *176*, 7320-7327.
- (10) Chen, G.; Peng, Z. Y.; Shan, L.; Xuan, N.; Tang, G. Y.; Zhang, Y.; Li, L.; He, Q. F.; Bi, Y. *P. J. Biomed. Biotechnol.* **2012**, *2012*, 652579.
- (11) Zhang, X.; Li, M.; Agrawal, A.; San, K. Y. *Metab. Eng.* **2011**, *13*, 713-722.
- (12) Zheng, Y.; Li, L.; Liu, Q.; Qin, W.; Yang, J.; Cao, Y.; Jiang, X.; Zhao, G.; Xian, M. *Biotechnol. Biofuels* **2012**, *5*, 76.
- (13) Jha, J. K.; Sinha, S.; Maiti, M. K.; Basu, A.; Mukhopadhyay, U. K.; Sen, S. K. *Plant Physiol. Biochem.* **2007**, *45*, 490-500.
- (14) Gong, Y.; Guo, X.; Wan, X.; Liang, Z.; Jiang, M. *J. Basic Microbiol.* **2011**, *51*, 666-672.
- (15) Serrano-Vega, M. J.; Garces, R.; Martinez-Force, E. *Planta* **2005**, *221*, 868-880.
- (16) Lee, S.; Park, S.; Park, C.; Pack, S. P.; Lee, J. *Enzyme Microb. Technol.* **2014**, *67*, 8-16.

- (17) Jing, F. Characterization of acyl-ACP thioesterases for the purpose of diversifying fatty acid synthesis pathway. Ph.D. Thesis, Iowa State University, Ames, IA, 2013.
- (18) Mayer, K. M.; Shanklin, J. *BMC Plant Biol.* **2007**, *7*.
- (19) Lo, Y. C.; Lin, S. C.; Shaw, J. F.; Liaw, Y. C. *J. Mol. Biol.* **2003**, *330*, 539-551.
- (20) Pantazes, R. J.; Grisewood, M. J.; Li, T.; Gifford, N. P.; Maranas, C. D. *J. Comput. Chem.* **2015**, *36*, 251-263.
- (21) Lo, Y.-C.; Lin, S.-C.; Shaw, J.-F.; Liaw, Y.-C. *Biochemistry* **2005**, *44*, 1971-1979.
- (22) Marchler-Bauer, A.; Derbyshire, M. K.; Gonzales, N. R.; Lu, S. N.; Chitsaz, F.; Geer, L. Y.; Geer, R. C.; He, J.; Gwadz, M.; Hurwitz, D. I.; Lanczycki, C. J.; Lu, F.; Marchler, G. H.; Song, J. S.; Thanki, N.; Wang, Z. X.; Yamashita, R. A.; Zhang, D. C.; Zheng, C. J.; Bryant, S. H. *Nucleic Acids Res.* **2015**, *43*, D222-D226.
- (23) Laskowski, R. A.; Macarthur, M. W.; Moss, D. S.; Thornton, J. M. *J. Appl. Crystallogr.* **1993**, *26*, 283-291.
